# Supplementary material for: The asymmetric synthesis of chiral cyclic α-hydroxy phosphonates and quaternary cyclic α-hydroxy phosphonates
Source: Royal Society of Chemistry journal article supplement (doi:10.1039/c1ob06669b), 2011-11-22
Supplement: c1ob06669b.pdf [file c1ob06669b.pdf]

# The Asymmetric Synthesis of Chiral Cyclic $\alpha$ -Hydroxy Phosphonates and Quaternary Cyclic $\alpha$ -Hydroxy Phosphonates

Chubei Wang, Chao Xu, Xiaosong Tan\*, Hao Peng and Hongwu He\*

*Key Laboratory of Pesticide & Chemical Biology, Ministry of Education, College of Chemistry,  
Central China Normal University, Wuhan, Hubei 430079, P. R. China*

Tel & Fax: +86-27-67867960;

E-mail: he1208@mail.ccnu.edu.cn or txs3542@mail.ccnu.edu.cn

## SUPPORTING INFORMATION

|                                                                                        |     |
|----------------------------------------------------------------------------------------|-----|
| 1. General.....                                                                        | S1  |
| 2. Typical Procedure for Asymmetric Hydrophosphonylation of Aldehydes and Ketones..... | S1  |
| 3. Copy of $^1\text{H}$ NMR and $^{13}\text{C}$ NMR Spectra.....                       | S12 |
| 4. The Crystal Structures of <b>7g</b> , <b>8d</b> and ( <i>S</i> )- <b>10d</b> .....  | S28 |

## 1. General

Melting points were recorded on a hot-plate microscope apparatus and uncorrected.  $^1\text{H}$  NMR spectra were measured on Varian-Mercury 600 (600 MHz) spectrometers. Chemical shifts were recorded in  $\delta$  (ppm) relative to tetramethylsilane (TMS) or residual solvent signals as the internal standard ( $\text{CHCl}_3$ ,  $\delta = 7.26$ ,  $\text{DMSO-d}_6$ ,  $\delta = 2.50$ ). Spectra were reported as follows: Chemical shifts ( $\delta$  ppm), multiplicity (s = singlet, d = doublet, t = triplet, q = quartet, m = multiplet), coupling constants (Hz), integration, and assignment.  $^{13}\text{C}$  NMR spectra were collected on Varian-Mercury 600 (150 MHz) spectrometers with complete proton decoupling. Chemical shifts were reported in ppm from the tetramethylsilane with the solvent resonance as internal standard ( $\text{DMSO-d}_6$ ,  $\delta = 39.5$ ). Infrared spectra were obtained as a KBr disc on a Perkin-Elmer PE-983 infrared spectrometer. The X-ray diffraction data were collected on a Bruker SMART AXS CCD diffractometer. Mass spectra were measured on a Finnigan Trace MS spectrometer. Elementary analyses were taken on a Vario EL III elementary analysis instrument. Optical rotations were measured on JASCO P-1020 polarimeter and reported as follows:  $[\alpha]_{\text{D}}^T$  ( $c = \text{g}/100 \text{ mL}$ , solvent). The enantiomeric excesses ( $ee$ ) of the products were determined by HPLC analysis on chiral DAICEL CHIRALPAK AS-H column at 254 nm unless specially indicated. All reagents are commercial reagents and were used as received. Solvents were purified by standard techniques<sup>1</sup>. The chiral ligands **9a-f** were prepared according to literature reported<sup>2</sup>. The progress of reaction was monitored by TLC.

## 2. Typical Procedure for Asymmetric Hydrophosphonylation of Aldehydes and Ketones

$\text{Et}_2\text{AlBr}$  (1.0 mmol) was added to a solution of ligand (**S**)-**9f** (1.0 mmol) in  $\text{CH}_2\text{Cl}_2$  (4 mL) under nitrogen. After stirring at room temperature for 30 minutes, the aldehyde or ketone (10 mmol) in THF (6 mL) and silver carbonate (0.4 mmol) were added and stirred for a further 30 minutes. The cyclic phosphite **6** (12 mmol) was added at  $-15\text{ }^\circ\text{C}$ , and the reaction solution was stirred for 2 hours. The reaction were quenched by diluted hydrochloric acid ( $v/v = 1/15$ ). The pure  $\alpha$ -hydroxy phosphonate **7** or **8** was afforded by column chromatography on silica gel (acetone/petroleum ether = 1/2).

## Products: $\alpha$ -hydroxy phosphonates 7

### 7a: (*S*)-2-[hydroxy(phenyl)methyl]-5,5-dimethyl-1,3,2-dioxaphosphinane-2-one

white solid; mp 154.1-155.3°C; The material was determined to be of 99% *ee* by chiral HPLC analysis [Daicel Chiralpak AS-H, *n*-hexane/*i*-PrOH = 10/90, 0.5 mL/min;  $t_r$  (major) = 14.22 min (*S*),  $t_r$  (minor) = 45.43 min (*R*)];  $[\alpha]_D^{20} = -78.3^\circ$  ( $c = 1.0$ , CHCl<sub>3</sub>); <sup>1</sup>H NMR (600 MHz, CDCl<sub>3</sub>):  $\delta$  0.80 (s, 3H), 1.11 (s, 3H), 3.97-4.06 (m, 4H), 5.16 (d,  $J = 11.4$  Hz, 1H), 7.31-7.38 (m, 3H), 7.50 (d,  $J = 7.2$  Hz, 2H). The <sup>1</sup>H NMR data were consistent with literature data<sup>3a</sup>.

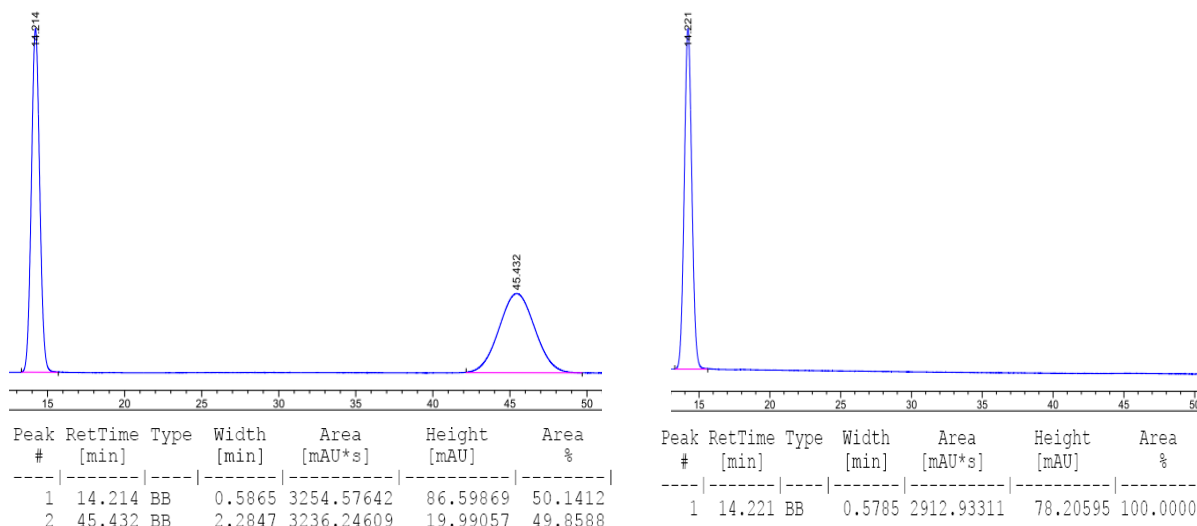

### 7b: (*S*)-2-[hydroxy(4-methylphenyl)methyl]-5,5-dimethyl-1,3,2-dioxaphosphinane-2-one

white solid; mp 170.3-172.1°C; The material was determined to be of 99% *ee* by chiral HPLC analysis [Daicel Chiralpak AS-H, *n*-hexane/*i*-PrOH = 10/90, 0.5 mL/min;  $t_r$  (major) = 16.24 min (*S*),  $t_r$  (minor) = 41.21 min (*R*)];  $[\alpha]_D^{20} = -60.7^\circ$  ( $c = 0.49$ , CHCl<sub>3</sub>); <sup>1</sup>H NMR (600 MHz, CDCl<sub>3</sub>):  $\delta$  0.84 (s, 3H), 1.11 (s, 3H), 2.34 (s, 3H), 3.98-4.05 (m, 4H), 5.12 (d,  $J = 10.8$  Hz, 1H), 7.18 (d,  $J = 7.2$  Hz, 2H), 7.38 (d,  $J = 6.6$  Hz, 2H). The <sup>1</sup>H NMR data were consistent with literature data<sup>3a</sup>.

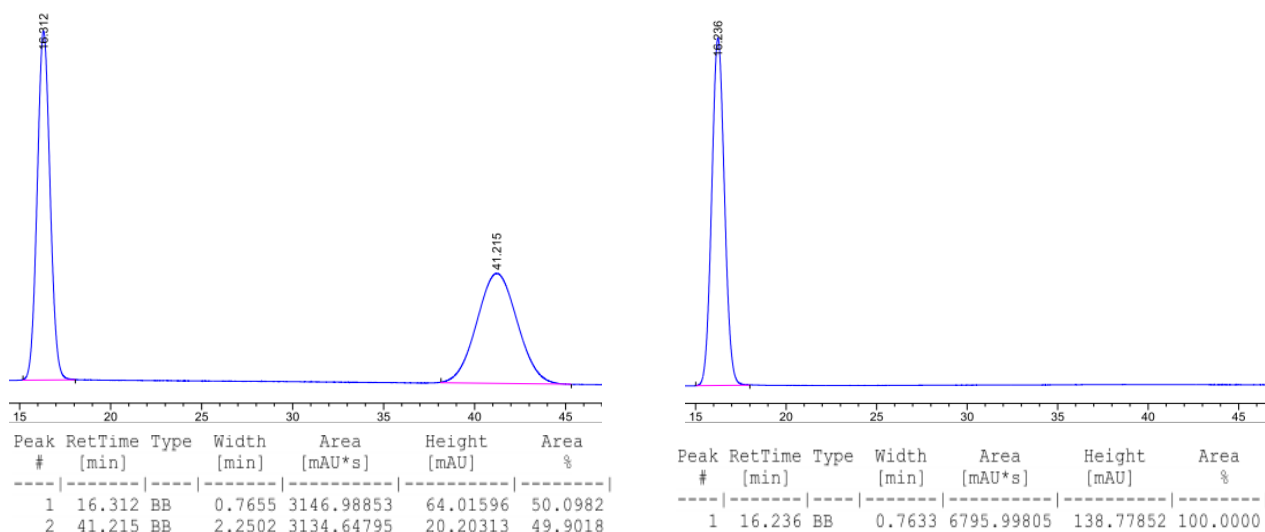

**7c: (S)-2-[hydroxy(3-methylphenyl)methyl]-5,5-dimethyl-1,3,2-dioxaphosphinane-2-one**

white solid; mp 175.9-176.9°C; The material was determined to be of 99% *ee* by chiral HPLC analysis [Daicel Chiralpak AS-H, *n*-hexane/*i*-PrOH = 10/90, 0.5 mL/min;  $t_r$  (major) = 12.97 min (*S*),  $t_r$  (minor) = 40.13 min (*R*)];  $[\alpha]_D^{20} = -59.2^\circ$  ( $c = 0.39$ , CHCl<sub>3</sub>); <sup>1</sup>H NMR (600 MHz, CDCl<sub>3</sub>):  $\delta$  0.83 (s, 3H), 1.12 (s, 3H), 2.36 (s, 3H), 3.99- 4.07 (m, 4H), 5.11 (d,  $J = 11.4$  Hz, 1H), 7.12(d,  $J = 7.2$  Hz, 1H), 7.28 (m, 3H). The <sup>1</sup>H NMR data were consistent with literature data<sup>3a</sup>.

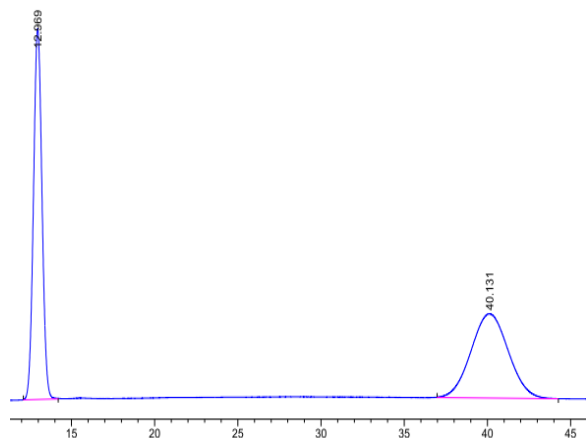

| Peak # | RetTime [min] | Type | Width [min] | Area [mAU*s] | Height [mAU] | Area %  |
|--------|---------------|------|-------------|--------------|--------------|---------|
| 1      | 12.969        | BB   | 0.5586      | 2904.99316   | 81.73599     | 50.0018 |
| 2      | 40.131        | BP   | 2.2094      | 2904.78125   | 18.56579     | 49.9982 |

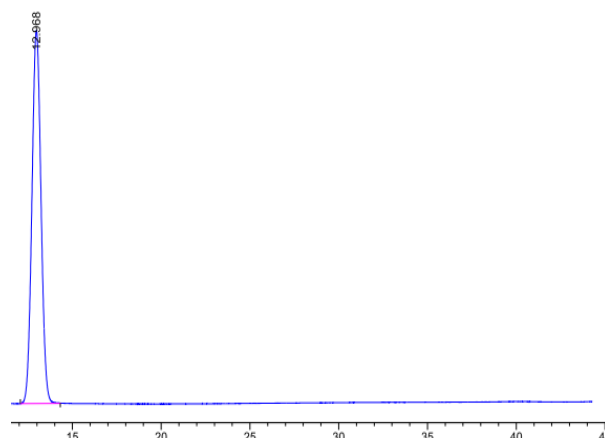

| Peak # | RetTime [min] | Type | Width [min] | Area [mAU*s] | Height [mAU] | Area %   |
|--------|---------------|------|-------------|--------------|--------------|----------|
| 1      | 12.968        | BB   | 0.5548      | 3338.90649   | 93.90493     | 100.0000 |

**7d: (S)-2-[hydroxy(4-chlorophenyl)methyl]-5,5-dimethyl-1,3,2-dioxaphosphinane-2-one**

white solid; mp 175.3-176.8°C; The material was determined to be of 99% *ee* by chiral HPLC analysis [Daicel Chiralpak AS-H, *n*-hexane/*i*-PrOH = 10/90, 0.5 mL/min;  $t_r$  (major) = 14.83 min (*S*),  $t_r$  (minor) = 39.14 min (*R*)];  $[\alpha]_D^{20} = -60.4^\circ$  ( $c = 0.56$ , CHCl<sub>3</sub>); <sup>1</sup>H NMR (600 MHz, CDCl<sub>3</sub>):  $\delta$  0.84 (s, 3H), 1.10 (s, 3H), 3.99-4.11 (m, 4H), 5.14 (d,  $J = 12.0$  Hz, 1H), 7.33 (d,  $J = 7.8$  Hz, 2H), 7.42 (d,  $J = 7.2$  Hz, 2H). The <sup>1</sup>H NMR data were consistent with literature data<sup>3a</sup>.

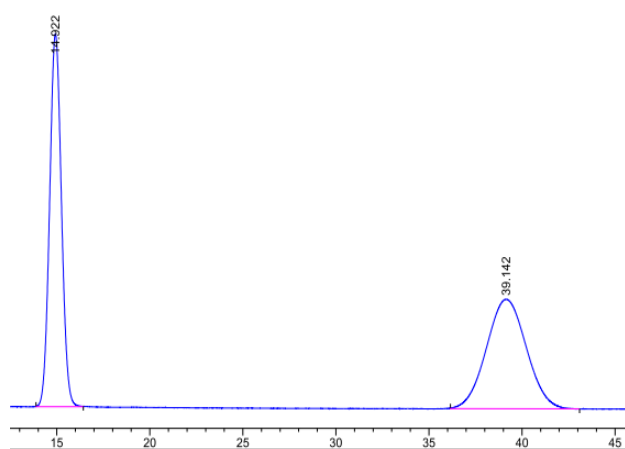

| Peak # | RetTime [min] | Type | Width [min] | Area [mAU*s] | Height [mAU] | Area %  |
|--------|---------------|------|-------------|--------------|--------------|---------|
| 1      | 14.922        | BB   | 0.6902      | 2667.19531   | 60.51818     | 50.1312 |
| 2      | 39.142        | BB   | 2.0738      | 2653.23511   | 17.77153     | 49.8688 |

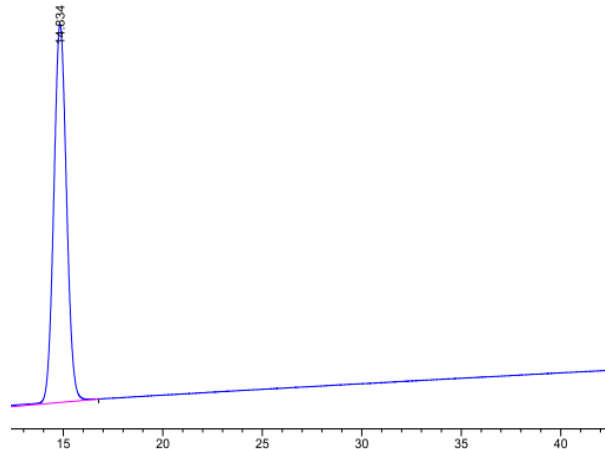

| Peak # | RetTime [min] | Type | Width [min] | Area [mAU*s] | Height [mAU] | Area %   |
|--------|---------------|------|-------------|--------------|--------------|----------|
| 1      | 14.834        | PB   | 0.7052      | 4395.84570   | 96.91525     | 100.0000 |

**7e: (S)-2-[hydroxy(4-bromophenyl)methyl]-5,5-dimethyl-1,3,2-dioxaphosphinane-2-one**

white solid; mp 189.1-191.6°C; The material was determined to be of 96% *ee* by chiral HPLC analysis [Daicel Chiralpak AS-H, *n*-hexane/*i*-PrOH = 10/90, 0.5 mL/min;  $t_r$  (major) = 15.81 min (*S*),  $t_r$  (minor) = 42.15 min (*R*)];  $[\alpha]_D^{20} = -59.6^\circ$  ( $c = 0.39$ , CHCl<sub>3</sub>); IR (KBr): 3233, 2978, 1483, 1247, 1202, 1180, 826 cm<sup>-1</sup>; <sup>1</sup>H NMR (600 MHz, CDCl<sub>3</sub>):  $\delta$  0.84 (s, 3H), 1.10 (s, 3H), 3.99-4.12 (m, 4H), 5.12 (d,  $J = 12$  Hz, 1H), 7.36 (d,  $J = 7.2$  Hz, 2H), 7.48 (d,  $J = 8.4$  Hz, 2H); <sup>13</sup>C NMR (150 MHz, DMSO-d<sub>6</sub>):  $\delta$  20.0, 21.5, 32.1, 68.8, 68.9, 69.9, 77.4, 78.0, 120.8, 129.4, 131.0, 138.1; MS (EI) ( $m/z$ ): 334 (M<sup>+</sup>); Anal. Calcd. for C<sub>12</sub>H<sub>16</sub>BrO<sub>4</sub>P: C 43.01, H 4.81; Found: C 43.20, H 4.67.

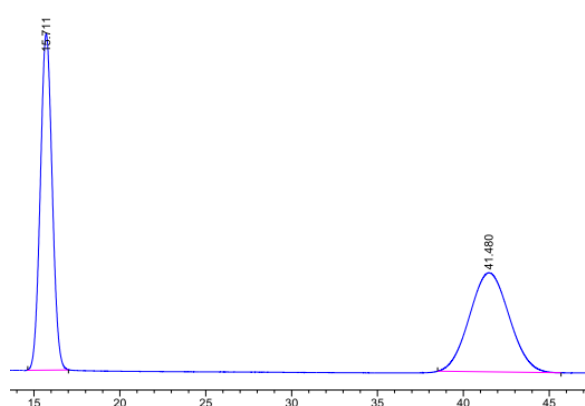

| Peak # | RetTime [min] | Type | Width [min] | Area [mAU*s] | Height [mAU] | Area %  |
|--------|---------------|------|-------------|--------------|--------------|---------|
| 1      | 15.711        | BB   | 0.7483      | 2542.69653   | 52.94592     | 50.3632 |
| 2      | 41.480        | BB   | 1.8880      | 2506.02368   | 15.60176     | 49.6368 |

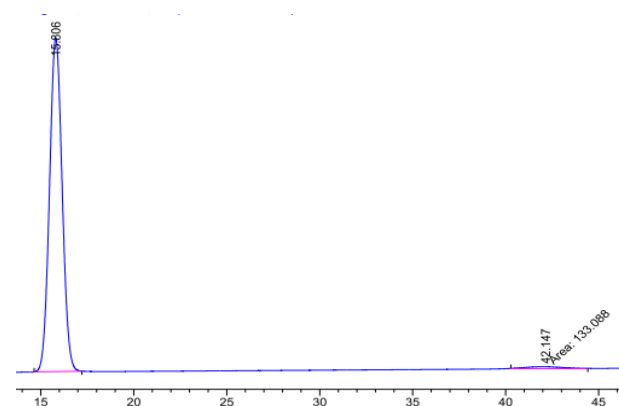

| Peak # | RetTime [min] | Type | Width [min] | Area [mAU*s] | Height [mAU] | Area %  |
|--------|---------------|------|-------------|--------------|--------------|---------|
| 1      | 15.806        | BB   | 0.7362      | 6555.02979   | 138.98593    | 98.0101 |
| 2      | 42.147        | MM   | 2.5705      | 133.08813    | 8.62930e-1   | 1.9899  |

**7f: (S)-2-[hydroxy(4-methoxyphenyl)methyl]-5,5-dimethyl-1,3,2-dioxaphosphinane-2-one**

white solid; mp 186.4-187.9°C; The material was determined to be of 92% *ee* by chiral HPLC analysis [Daicel Chiralpak AS-H, *n*-hexane/*i*-PrOH = 10/90, 0.5 mL/min;  $t_r$  (major) = 27.02 min (*S*),  $t_r$  (minor) = 49.84 min (*R*)];  $[\alpha]_D^{20} = -59.6^\circ$  ( $c = 0.42$ , CHCl<sub>3</sub>); <sup>1</sup>H NMR (600 MHz, CDCl<sub>3</sub>):  $\delta$  0.86 (s, 3H), 1.12 (s, 3H), 3.81 (s, 3H), 4.03-4.05 (m, 4H), 5.10 (d,  $J = 10.2$  Hz, 1H), 6.91 (d,  $J = 8.4$  Hz, 2H), 7.43 (d,  $J = 7.2$  Hz, 2H). The <sup>1</sup>H NMR data were consistent with literature data<sup>3a</sup>

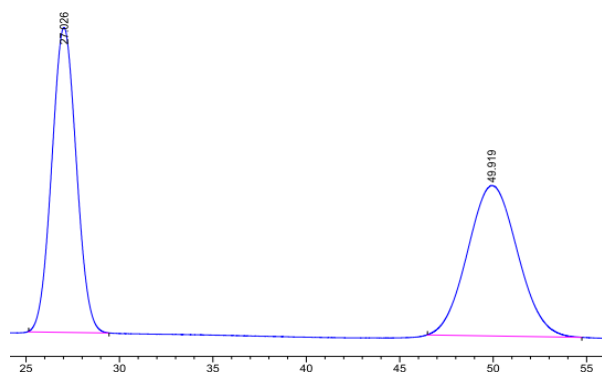

| Peak # | RetTime [min] | Type | Width [min] | Area [mAU*s] | Height [mAU] | Area %  |
|--------|---------------|------|-------------|--------------|--------------|---------|
| 1      | 27.026        | BB   | 1.3688      | 2704.04614   | 29.57046     | 49.8733 |
| 2      | 49.919        | BB   | 2.1846      | 2717.78101   | 14.59456     | 50.1267 |

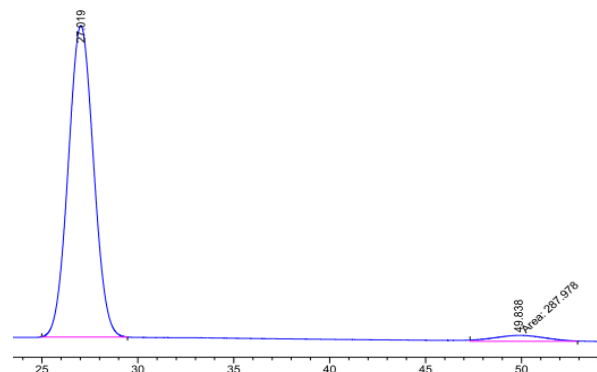

| Peak # | RetTime [min] | Type | Width [min] | Area [mAU*s] | Height [mAU] | Area %  |
|--------|---------------|------|-------------|--------------|--------------|---------|
| 1      | 27.019        | BB   | 1.3993      | 7335.66943   | 79.88567     | 96.2226 |
| 2      | 49.838        | MM   | 3.1602      | 287.97803    | 1.51878      | 3.7774  |

**7g: (S)-2-[hydroxy(2,4-dichlorophenyl)methyl]-5,5-dimethyl-1,3,2-dioxaphosphinane-2-one**

white solid; mp 188.4-189.2°C; The material was determined to be of 99% *ee* by chiral HPLC analysis [Daicel Chiralpak AS-H, *n*-hexane/*i*-PrOH = 10/90, 0.5 mL/min;  $t_r$  (major) = 13.22 min (*S*),  $t_r$  (minor) = 24.85 min (*R*)];  $[\alpha]_D^{20} = -63.1^\circ$  ( $c = 0.52$ , CHCl<sub>3</sub>); <sup>1</sup>H NMR (600 MHz, CDCl<sub>3</sub>):  $\delta$  0.87 (s, 3H), 1.10 (s, 3H), 3.96-4.10 (m, 4H), 5.62 (d,  $J = 12.0$  Hz, 1H), 7.31 (d,  $J = 8.4$  Hz, 1H), 7.39 (s, 1H), 7.70 (d,  $J = 7.2$  Hz, 1H). The <sup>1</sup>H NMR data were consistent with literature data<sup>3a</sup>.

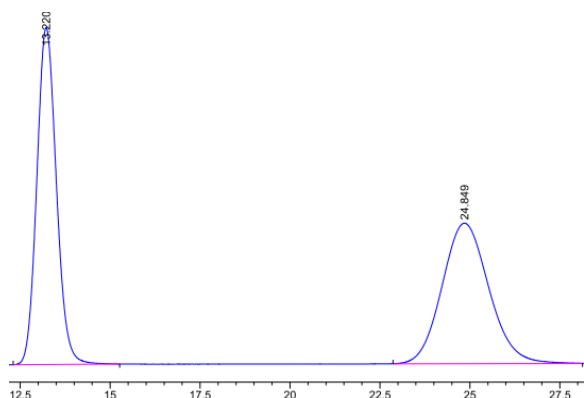

| Peak # | RetTime [min] | Type | Width [min] | Area [mAU*s] | Height [mAU] | Area %  |
|--------|---------------|------|-------------|--------------|--------------|---------|
| 1      | 13.220        | BB   | 0.5856      | 6254.34082   | 165.24513    | 49.9945 |
| 2      | 24.849        | BB   | 1.4144      | 6255.71582   | 68.95677     | 50.0055 |

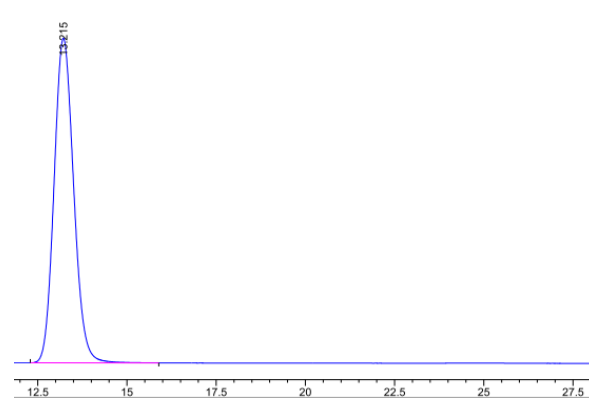

| Peak # | RetTime [min] | Type | Width [min] | Area [mAU*s] | Height [mAU] | Area %   |
|--------|---------------|------|-------------|--------------|--------------|----------|
| 1      | 13.215        | BB   | 0.5985      | 1.74550e4    | 456.11603    | 100.0000 |

**7h: (S)-2-[hydroxy(2,3-dichlorophenyl)methyl]-5,5-dimethyl-1,3,2-dioxaphosphinane-2-one**

white solid; mp 193.1-194.5°C; The material was determined to be of 99% *ee* by chiral HPLC analysis [Daicel Chiralpak AS-H, *n*-hexane/*i*-PrOH = 10/90, 0.5 mL/min;  $t_r$  (major) = 9.86 min (*S*),  $t_r$  (minor) = 19.32 min (*R*)];  $[\alpha]_D^{20} = -61.8^\circ$  ( $c = 0.51$ , CHCl<sub>3</sub>); IR (KBr): 3221, 2970, 1375, 1237, 1185, 749, 683 cm<sup>-1</sup>; <sup>1</sup>H NMR (600 MHz, CDCl<sub>3</sub>):  $\delta$  0.87 (s, 3H), 1.10 (s, 3H), 3.98-4.11 (m, 4H), 5.71 (d,  $J = 12.0$  Hz, 1H), 7.27 (d,  $J = 7.8$  Hz, 1H), 7.44 (d,  $J = 7.8$  Hz, 1H), 7.68 (d,  $J = 7.2$  Hz, 1H). <sup>13</sup>C NMR (150 MHz, DMSO-d<sub>6</sub>):  $\delta$  19.9, 21.3, 32.0, 67.3, 68.4, 77.8, 78.0, 128.0, 128.3, 129.7, 131.4, 138.9, 139.0; MS (EI) ( $m/z$ ): 324 ( $M^+$ ); Anal. Calcd. for C<sub>12</sub>H<sub>15</sub>Cl<sub>2</sub>O<sub>4</sub>P: C 44.33, H 4.65; Found: C 44.36, H 4.59.

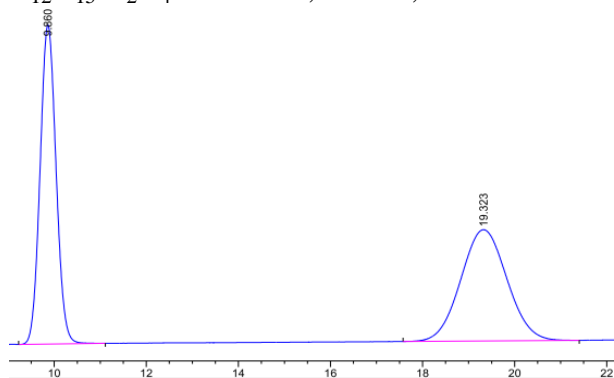

| Peak # | RetTime [min] | Type | Width [min] | Area [mAU*s] | Height [mAU] | Area %  |
|--------|---------------|------|-------------|--------------|--------------|---------|
| 1      | 9.860         | VB   | 0.3777      | 5477.30615   | 226.84142    | 49.7786 |
| 2      | 19.323        | BB   | 1.0990      | 5526.02393   | 79.10829     | 50.2214 |

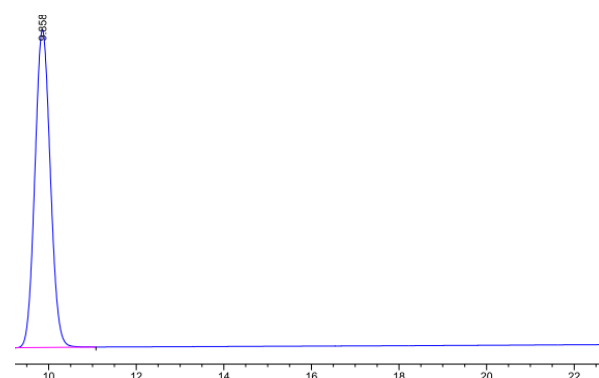

| Peak # | RetTime [min] | Type | Width [min] | Area [mAU*s] | Height [mAU] | Area %   |
|--------|---------------|------|-------------|--------------|--------------|----------|
| 1      | 9.858         | PB   | 0.3811      | 1.19391e4    | 488.48492    | 100.0000 |

**7i: (S)-2-[hydroxy(3,4-dichlorophenyl)methyl]-5,5-dimethyl-1,3,2-dioxaphosphinane-2-one**

white solid; mp 189.8-191.5°C; The material was determined to be of 99% *ee* by chiral HPLC analysis [Daicel Chiralpak AS-H, *n*-hexane/*i*-PrOH = 10/90, 0.5 mL/min;  $t_r$  (major) = 17.50 min (*S*),  $t_r$  (minor) = 54.93 min (*R*)];  $[\alpha]_D^{20} = -60.2^\circ$  ( $c = 0.48$ , CHCl<sub>3</sub>); IR (KBr): 3273, 2967, 1466, 1247, 1193, 885, 822 cm<sup>-1</sup>; <sup>1</sup>H NMR (600 MHz, CDCl<sub>3</sub>):  $\delta$  0.88 (s, 3H), 1.12 (s, 3H), 4.04-4.15 (m, 4H), 5.14 (d,  $J = 12.6$  Hz, 1H), 7.33 (d,  $J = 7.8$  Hz, 1H), 7.43 (d,  $J = 8.4$  Hz, 1H), 7.61 (s, 1H); <sup>13</sup>C NMR (150 MHz, DMSO-*d*<sub>6</sub>):  $\delta$  19.9, 21.5, 32.2, 68.1, 69.2, 77.6, 78.0, 127.5, 129.0, 130.2, 130.3, 130.8, 139.9; MS (EI) (*m/z*): 324 (*M*<sup>+</sup>); Anal. Calcd. for C<sub>12</sub>H<sub>15</sub>Cl<sub>2</sub>O<sub>4</sub>P: C 44.33, H 4.65; Found: C 44.56, H 4.68.

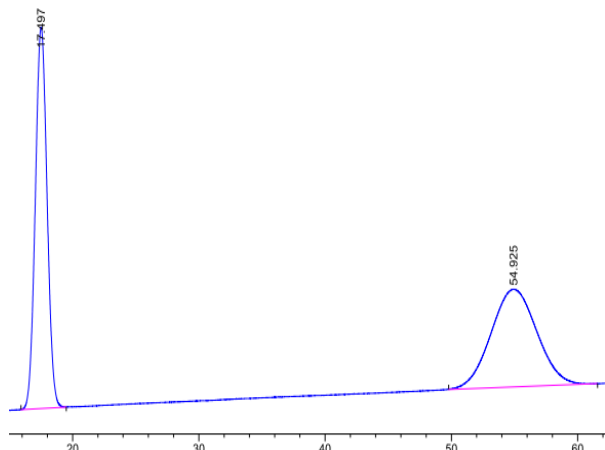

| Peak # | RetTime [min] | Type | Width [min] | Area [mAU*s] | Height [mAU] | Area %  |
|--------|---------------|------|-------------|--------------|--------------|---------|
| 1      | 17.497        | BB   | 1.0154      | 5597.28760   | 86.45017     | 49.9910 |
| 2      | 54.925        | BP   | 2.9742      | 5599.30908   | 22.17241     | 50.0090 |

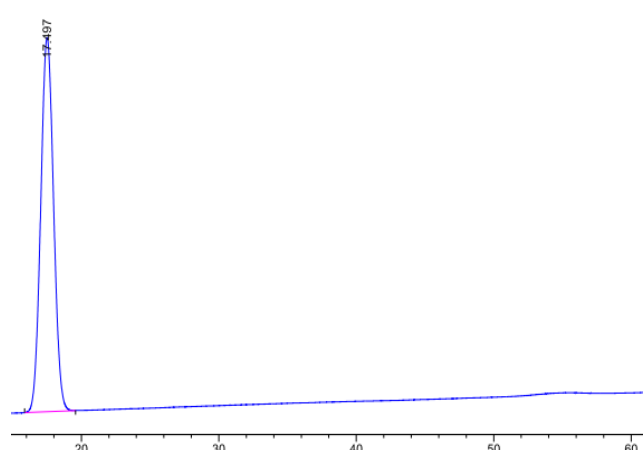

| Peak # | RetTime [min] | Type | Width [min] | Area [mAU*s] | Height [mAU] | Area %   |
|--------|---------------|------|-------------|--------------|--------------|----------|
| 1      | 17.497        | BB   | 1.0180      | 9997.98730   | 153.89265    | 100.0000 |

**7j: (S)-2-[hydroxy(furan-2-yl)methyl]-5,5-dimethyl-1,3,2-dioxaphosphinane-2-one**

white solid; mp 202.4-203.4°C; The material was determined to be of 99% *ee* by chiral HPLC analysis [Daicel Chiralpak AS-H, *n*-hexane/*i*-PrOH = 10/90, 0.5 mL/min;  $t_r$  (major) = 16.73 min (*S*),  $t_r$  (minor) = 65.11 min (*R*)];  $[\alpha]_D^{20} = -64.1^\circ$  ( $c = 0.53$ , CHCl<sub>3</sub>); <sup>1</sup>H NMR (600 MHz, CDCl<sub>3</sub>):  $\delta$  0.89 (s, 3H), 1.21 (s, 3H), 4.00-4.04 (m, 2H), 4.24-4.25 (m, 2H), 5.20 (d,  $J = 13.2$  Hz, 1H), 6.38 (s, 1H), 6.52 (s, 1H), 7.43 (s, 1H). The <sup>1</sup>H NMR data were consistent with literature data<sup>3b</sup>.

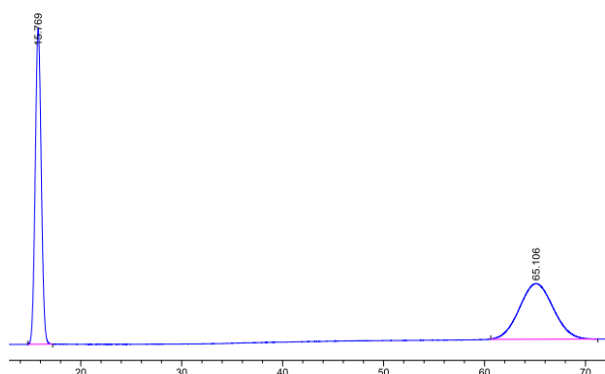

| Peak # | RetTime [min] | Type | Width [min] | Area [mAU*s] | Height [mAU] | Area %  |
|--------|---------------|------|-------------|--------------|--------------|---------|
| 1      | 15.769        | BB   | 0.6538      | 4314.81104   | 103.62823    | 50.2354 |
| 2      | 65.106        | BB   | 2.8034      | 4274.37598   | 18.28399     | 49.7646 |

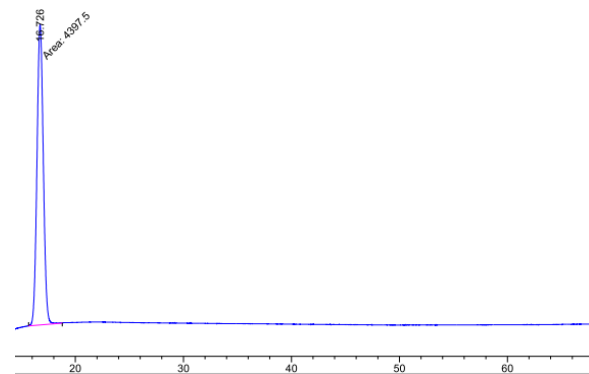

| Peak # | RetTime [min] | Type | Width [min] | Area [mAU*s] | Height [mAU] | Area %   |
|--------|---------------|------|-------------|--------------|--------------|----------|
| 1      | 16.726        | MM   | 0.6771      | 4397.49609   | 108.25129    | 100.0000 |

**7k: (S)-2-[hydroxy(thiophen-2-yl)methyl]-5,5-dimethyl-1,3,2-dioxaphosphinane-2-one**

yellowish solid; mp 226.0-227.4°C; The material was determined to be of 99% *ee* by chiral HPLC analysis [Daicel Chiralpak AS-H, *n*-hexane/*i*-PrOH = 10/90, 0.5 mL/min;  $t_r$  (major) = 16.27 min (*S*),  $t_r$  (minor) = 74.23 min (*R*)];  $[\alpha]_D^{20} = -62.1^\circ$  ( $c = 0.42$ , CHCl<sub>3</sub>); IR (KBr): 3215, 2968, 1469, 1237, 1079, 825, 722 cm<sup>-1</sup>; <sup>1</sup>H NMR (600 MHz, CDCl<sub>3</sub>):  $\delta$  0.88 (s, 3H), 1.19 (s, 3H), 4.02-4.25 (m, 4H), 5.41 (d,  $J = 12.0$  Hz, 1H), 7.01 (t,  $J = 4.2$  Hz, 1H), 7.20 (s, 1H), 7.32 (d,  $J = 4.8$  Hz, 1H); <sup>13</sup>C NMR (150 MHz, DMSO-*d*<sub>6</sub>):  $\delta$  20.0, 21.6, 32.1, 65.8, 66.9, 77.6, 78.0, 125.6, 125.9, 126.8, 141.8; MS (EI) (*m/z*): 262 (M<sup>+</sup>); Anal. Calcd. for C<sub>10</sub>H<sub>15</sub>O<sub>4</sub>PS: C 45.80, H 5.76; Found: C 45.61; H 5.72.

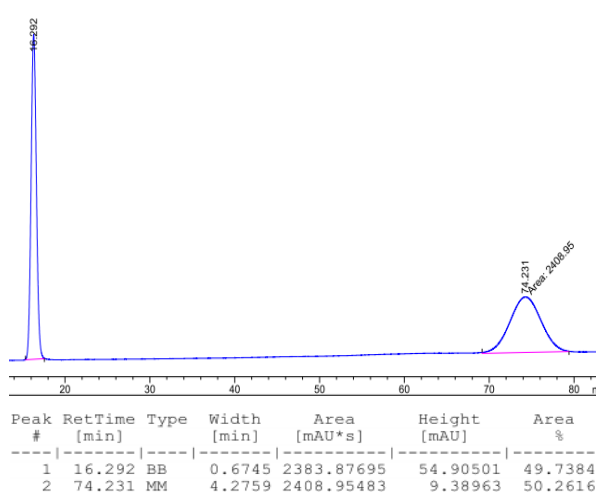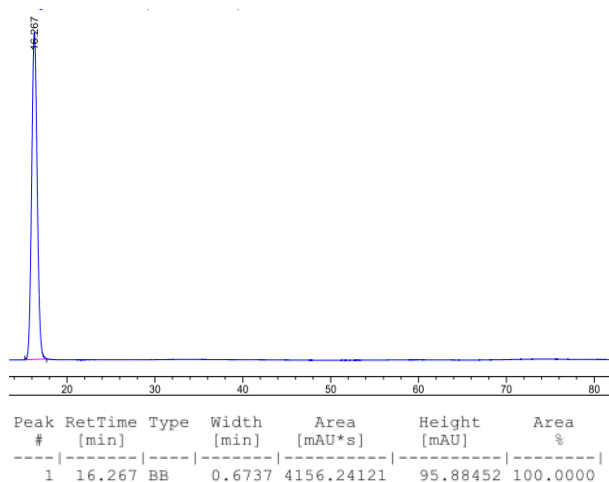

**Products:  $\alpha$ -hydroxy phosphonates 8**

**8a: (S)-2-[1-hydroxy-1-(4-chlorophenyl)ethyl]-5,5-dimethyl-1,3,2-dioxaphosphinane-2-one**

white solid; mp 149.8-151.6°C; The material was determined to be of 98% *ee* by chiral HPLC analysis [Daicel Chiralpak AS-H, *n*-hexane/*i*-PrOH = 85/15, 0.5 mL/min;  $t_r$  (minor) = 9.26 min (*R*),  $t_r$  (major) = 11.81 min (*S*)];  $[\alpha]_D^{20} = -53.4^\circ$  ( $c = 0.54$ , CHCl<sub>3</sub>); IR (KBr): 3241, 2970, 1489, 1222, 1138, 829 cm<sup>-1</sup>; <sup>1</sup>H NMR (600 MHz, CDCl<sub>3</sub>):  $\delta$  0.86 (s, 3H), 1.07 (s, 3H), 1.88 (d,  $J = 15.6$  Hz, 3H), 3.96-4.09 (m, 4H), 7.34 (d,  $J = 8.4$  Hz, 2H), 7.57 (m, 2H); <sup>13</sup>C NMR (150 MHz, DMSO-*d*<sub>6</sub>):  $\delta$  20.0, 21.4, 25.5, 32.0, 74.6, 75.6, 78.0, 78.5, 127.7, 128.1, 131.8, 142.0; MS (EI) (*m/z*): 304 (M<sup>+</sup>); Anal. Calcd. for C<sub>13</sub>H<sub>18</sub>ClO<sub>4</sub>P: C 51.24, H 5.95; Found: C 50.96, H 5.90.

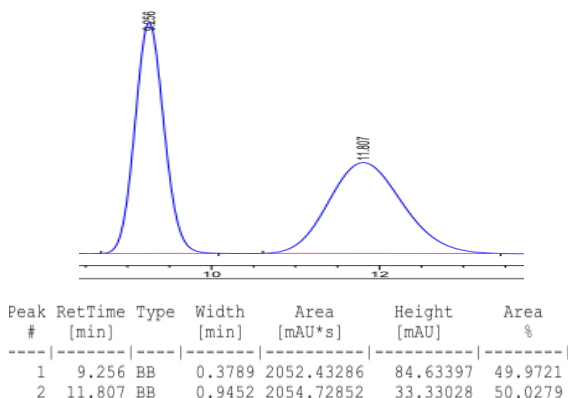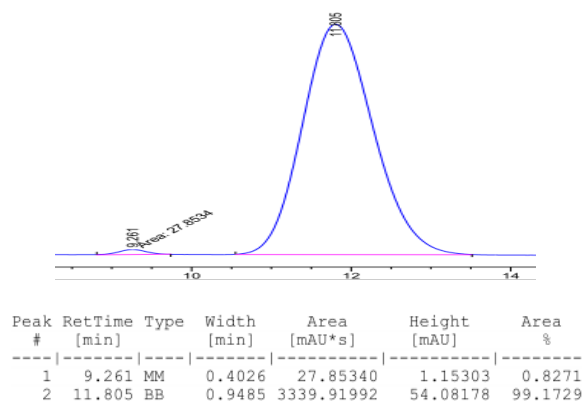



**8b: (S)-2-[1-hydroxy-1-(3-chlorophenyl)ethyl]-5,5-dimethyl-1,3,2-dioxaphosphinane-2-one**

white solid; mp 142.0-143.6°C; The material was determined to be of 97% *ee* by chiral HPLC analysis [Daicel Chiralpak AS-H, *n*-hexane/*i*-PrOH = 85/15, 0.5 mL/min;  $t_r$  (minor) = 9.51 min (*R*),  $t_r$  (major) = 11.18 min (*S*)];  $[\alpha]_D^{20} = -53.7^\circ$  ( $c = 0.51$ , CHCl<sub>3</sub>); IR (KBr): 3229, 2969, 1486, 1222, 1138, 787, 691 cm<sup>-1</sup>; <sup>1</sup>H NMR (600 MHz, DMSO-*d*<sub>6</sub>):  $\delta$  0.85 (s, 3H), 1.15 (s, 3H), 1.74 (d,  $J = 15.6$  Hz, 3H), 3.89-3.93 (m, 1H), 4.03-4.08 (m, 1H), 4.39-4.40 (m, 1H), 4.47-4.49 (m, 1H), 7.37-7.43 (m, 2H), 7.54-7.60 (m, 2H); <sup>13</sup>C NMR (150 MHz, DMSO-*d*<sub>6</sub>):  $\delta$  20.0, 21.4, 25.6, 32.0, 74.6, 75.6, 78.0, 78.5, 124.9, 125.8, 126.9, 129.7, 132.6, 145.5; MS (EI) ( $m/z$ ): 304 (M<sup>+</sup>); Anal. Calcd. for C<sub>13</sub>H<sub>18</sub>ClO<sub>4</sub>P: C 51.24, H 5.95; Found: C 50.98, H 5.91.

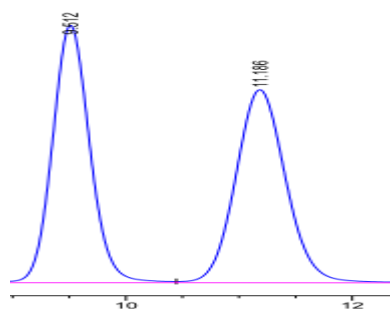

| Peak # | RetTime [min] | Type | Width [min] | Area [mAU*s] | Height [mAU] | Area %  |
|--------|---------------|------|-------------|--------------|--------------|---------|
| 1      | 9.512         | VV   | 0.3567      | 3080.73755   | 133.75887    | 49.9206 |
| 2      | 11.186        | VV   | 0.4752      | 3090.54346   | 100.36668    | 50.0794 |

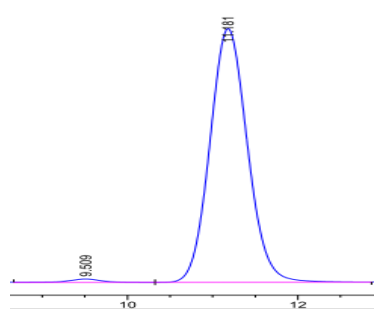

| Peak # | RetTime [min] | Type | Width [min] | Area [mAU*s] | Height [mAU] | Area %  |
|--------|---------------|------|-------------|--------------|--------------|---------|
| 1      | 9.509         | VV   | 0.4380      | 81.21056     | 2.70687      | 1.2984  |
| 2      | 11.181        | VB   | 0.4779      | 6173.24268   | 201.21259    | 98.7016 |

**8c: (S)-2-[1-hydroxy-1-(2-chlorophenyl)ethyl]-5,5-dimethyl-1,3,2-dioxaphosphinane-2-one**

white solid; mp 145.9-147.8°C; The material was determined to be of 99% *ee* by chiral HPLC analysis [Daicel Chiralpak AS-H, *n*-hexane/*i*-PrOH = 85/15, 0.5 mL/min;  $t_r$  (minor) = 9.05 min (*R*),  $t_r$  (major) = 10.69 min (*S*)];  $[\alpha]_D^{20} = -58.4^\circ$  ( $c = 0.52$ , CHCl<sub>3</sub>); IR (KBr): 3241, 2970, 1489, 1222, 1138, 768 cm<sup>-1</sup>; <sup>1</sup>H NMR (600 MHz, DMSO-*d*<sub>6</sub>):  $\delta$  0.85 (s, 3H), 1.14 (s, 3H), 1.74 (d,  $J = 15.6$  Hz, 3H), 3.87-3.92 (m, 1H), 4.03-4.07 (m, 1H), 4.37-4.39 (m, 1H), 4.47-4.48 (m, 1H), 7.44 (d,  $J = 7.8$  Hz, 2H), 7.59 (m,  $J = 7.2$  Hz, 2H); <sup>13</sup>C NMR (150 MHz, DMSO-*d*<sub>6</sub>):  $\delta$  20.0, 21.4, 25.5, 32.0, 74.5, 75.6, 77.9, 78.4, 127.6, 128.0, 131.8, 141.9; MS (EI) ( $m/z$ ): 304 (M<sup>+</sup>); Anal. Calcd. for C<sub>13</sub>H<sub>18</sub>ClO<sub>4</sub>P: C 51.24, H 5.95; Found: C 51.06, H 5.89.

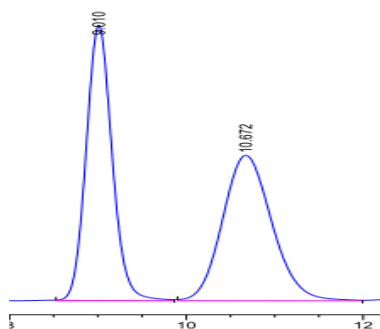

| Peak # | RetTime [min] | Type | Width [min] | Area [mAU*s] | Height [mAU] | Area %  |
|--------|---------------|------|-------------|--------------|--------------|---------|
| 1      | 9.010         | BB   | 0.3145      | 2643.16187   | 129.28024    | 49.9377 |
| 2      | 10.672        | BB   | 0.6028      | 2649.75195   | 68.27175     | 50.0623 |

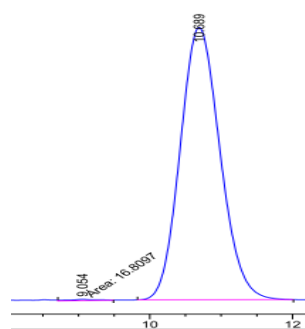

| Peak # | RetTime [min] | Type | Width [min] | Area [mAU*s] | Height [mAU] | Area %  |
|--------|---------------|------|-------------|--------------|--------------|---------|
| 1      | 9.054         | MM   | 0.4712      | 16.80968     | 5.94560e-1   | 0.3955  |
| 2      | 10.689        | BB   | 0.6074      | 4233.41016   | 108.92749    | 99.6045 |

**8d: (S)-2-[1-hydroxy-1-(4-bromophenyl)ethyl]-5,5-dimethyl-1,3,2-dioxaphosphinane-2-one**

white solid; mp 148.5-150.2°C; The material was determined to be of 95% *ee* by chiral HPLC analysis [Daicel Chiralpak AS-H, *n*-hexane/*i*-PrOH = 85/15, 0.5 mL/min;  $t_r$  (minor) = 9.42 min (*R*),  $t_r$  (major) = 12.17 min (*S*);  $[\alpha]_D^{20} = -64.8^\circ$  ( $c = 0.56$ , CHCl<sub>3</sub>); IR (KBr): 3239, 2970, 1486, 1222, 1138, 830 cm<sup>-1</sup>; <sup>1</sup>H NMR (600 MHz, CDCl<sub>3</sub>):  $\delta$  0.84 (s, 3H), 1.06 (s, 3H), 1.85 (d,  $J = 15.6$  Hz, 3H), 4.00-4.01 (m, 4H), 7.49 (m, 4H); <sup>13</sup>C NMR (150 MHz, DMSO-*d*<sub>6</sub>):  $\delta$  19.8, 21.3, 25.4, 31.8, 74.5, 75.5, 77.8, 78.3, 120.3, 128.3, 130.4, 142.2; MS (EI) (*m/z*): 348 (M<sup>+</sup>); Anal. Calcd. for C<sub>13</sub>H<sub>18</sub>BrO<sub>4</sub>P: C 44.72, H 5.20 %; Found: C 44.51; H 5.31.

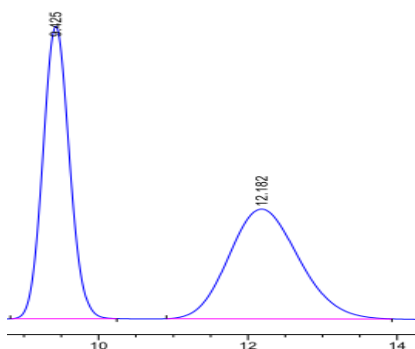

| Peak # | RetTime [min] | Type | Width [min] | Area [mAU*s] | Height [mAU] | Area %  |
|--------|---------------|------|-------------|--------------|--------------|---------|
| 1      | 9.425         | BB   | 0.3879      | 2268.59131   | 91.28895     | 50.1443 |
| 2      | 12.182        | BB   | 0.9917      | 2255.53442   | 34.27659     | 49.8557 |

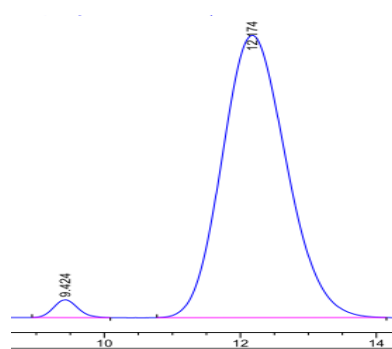

| Peak # | RetTime [min] | Type | Width [min] | Area [mAU*s] | Height [mAU] | Area %  |
|--------|---------------|------|-------------|--------------|--------------|---------|
| 1      | 9.424         | BB   | 0.3912      | 182.54555    | 7.26401      | 2.3350  |
| 2      | 12.174        | BB   | 1.0345      | 7635.13525   | 115.60606    | 97.6650 |

**8e: (S)-2-[1-hydroxy-1-(3-bromoophenyl)ethyl]-5,5-dimethyl-1,3,2-dioxaphosphinane-2-one**

white solid; mp 162.3-163.5°C; The material was determined to be of 95% *ee* by chiral HPLC analysis [Daicel Chiralpak AS-H, *n*-hexane/*i*-PrOH = 85/15, 0.5 mL/min;  $t_r$  (minor) = 10.14 min (*R*),  $t_r$  (major) = 12.58 min (*S*);  $[\alpha]_D^{20} = -74.0^\circ$  ( $c = 0.41$ , CHCl<sub>3</sub>); IR (KBr): 3233, 2969, 1477, 1225, 1139, 777, 690 cm<sup>-1</sup>; <sup>1</sup>H NMR (600 MHz, CDCl<sub>3</sub>):  $\delta$  0.87 (s, 3H), 1.10 (s, 3H), 1.89 (d,  $J = 15.6$  Hz, 3H), 3.96-4.11 (m, 4H), 7.27 (m, 1H), 7.45 (d,  $J = 7.8$  Hz, 1H), 7.58 (d,  $J = 8.4$  Hz, 1H), 7.81 (d,  $J = 1.8$  Hz, 1H); <sup>13</sup>C NMR (150 MHz, DMSO-*d*<sub>6</sub>):  $\delta$  20.0, 21.4, 25.7, 32.0 (d,  $J = 8.55$  Hz), 74.5, 75.6, 78.0, 78.6, 121.3, 125.2, 128.7, 129.8, 130.0, 145.8; MS (EI) (*m/z*): 348 (M<sup>+</sup>); Anal. Calcd. for C<sub>13</sub>H<sub>18</sub>BrO<sub>4</sub>P: C 44.72, H 5.20; Found: C 44.39, H 5.48.

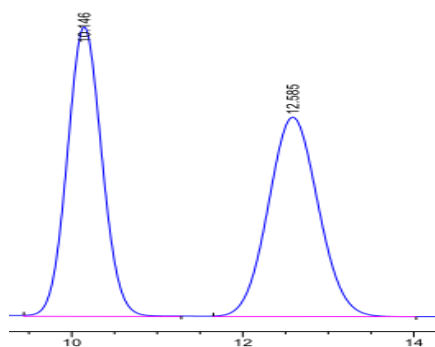

| Peak # | RetTime [min] | Type | Width [min] | Area [mAU*s] | Height [mAU] | Area %  |
|--------|---------------|------|-------------|--------------|--------------|---------|
| 1      | 10.146        | BB   | 0.4428      | 3571.77808   | 125.96223    | 50.1654 |
| 2      | 12.585        | BB   | 0.6411      | 3548.22900   | 86.77180     | 49.8346 |

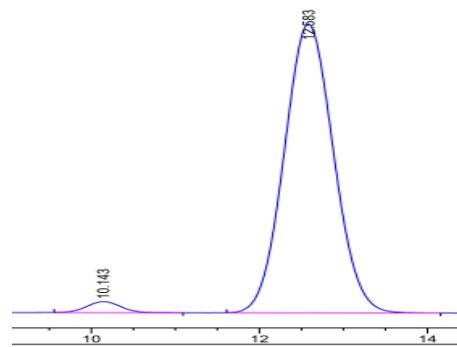

| Peak # | RetTime [min] | Type | Width [min] | Area [mAU*s] | Height [mAU] | Area %  |
|--------|---------------|------|-------------|--------------|--------------|---------|
| 1      | 10.143        | BB   | 0.4453      | 168.77376    | 5.90750      | 2.5965  |
| 2      | 12.583        | BB   | 0.6413      | 6331.33350   | 154.74683    | 97.4035 |

**8f: (S)-2-[1-hydroxy-1-(4-fluorophenyl)ethyl]-5,5-dimethyl-1,3,2-dioxaphosphinane-2-one**

white solid; mp 168.7-169.9°C; The material was determined to be of 96% *ee* by chiral HPLC analysis [Daicel Chiralpak AS-H, *n*-hexane/*i*-PrOH = 85/15, 0.5 mL/min;  $t_r$  (minor) = 9.27 min (*R*),  $t_r$  (major) = 10.60 min (*S*)];  $[\alpha]_D^{20} = -65.0^\circ$  ( $c = 0.64$ , CHCl<sub>3</sub>); IR (KBr): 3220, 2974, 1510, 1374, 1223, 1135, 828 cm<sup>-1</sup>; <sup>1</sup>H NMR (600 MHz, CDCl<sub>3</sub>): δ 0.86 (s, 3H), 1.07 (s, 3H), 1.89 (d,  $J = 15.6$  Hz, 3H), 3.92-4.10 (m, 4H), 7.06 (m, 2H), 7.61 (m, 2H); <sup>13</sup>C NMR (150 MHz, DMSO-d<sub>6</sub>): δ 20.0, 21.4, 25.6, 31.9, 74.4, 75.5, 78.3(m), 114.4(d,  $J = 6.9$  Hz), 128.1, 139.0, 160.5, 162.1; MS (EI) (*m/z*): 288 (M<sup>+</sup>); Anal. Calcd. for C<sub>13</sub>H<sub>18</sub>FO<sub>4</sub>P: C 54.17, H 6.29 ; Found: C 54.19; H 6.51.

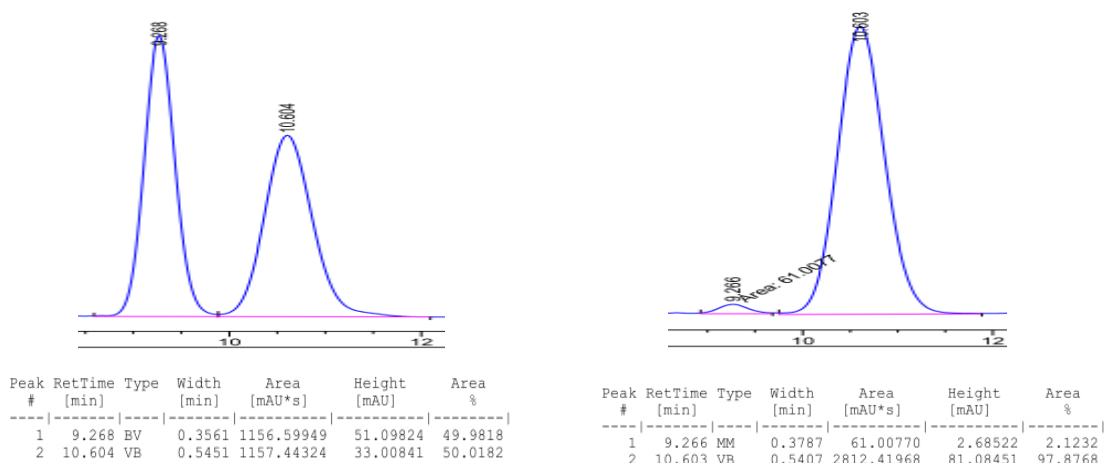

**8g: (S)-2-[1-hydroxy-1-(4-methoxyphenyl)ethyl]-5,5-dimethyl-1,3,2-dioxaphosphinane-2-one**

white solid; mp 155.6-156.3°C; The material was determined to be of 98% *ee* by chiral HPLC analysis [Daicel Chiralpak AS-H, *n*-hexane/*i*-PrOH = 85/15, 0.5 mL/min;  $t_r$  (minor) = 11.03 min (*R*),  $t_r$  (major) = 21.82 min (*S*)];  $[\alpha]_D^{20} = -48.1^\circ$  ( $c = 0.48$ , CHCl<sub>3</sub>); IR (KBr): 3329, 2969, 1513, 1251, 1230, 1137, 830 cm<sup>-1</sup>; <sup>1</sup>H NMR (600 MHz, CDCl<sub>3</sub>): δ 0.88 (s, 3H), 1.10 (s, 3H), 1.90 (d,  $J = 15.6$  Hz, 3H), 3.82 (s, 3H), 3.90-4.08 (m, 4H), 6.93 (d,  $J = 8.4$  Hz, 2H), 7.56 (d,  $J = 6.6$  Hz, 2H); <sup>13</sup>C NMR (150 MHz, DMSO-d<sub>6</sub>): δ 20.1, 21.5, 25.6, 32.0 (d,  $J = 7.05$  Hz), 55.1, 74.4, 75.5, 77.7, 78.2, 113.1, 127.4, 134.7, 158.3; MS (EI) (*m/z*): 300(M<sup>+</sup>); Anal. Calcd. for C<sub>14</sub>H<sub>21</sub>O<sub>5</sub>P: C 56.00, H 7.05 %; Found: C 55.72, H 7.28.

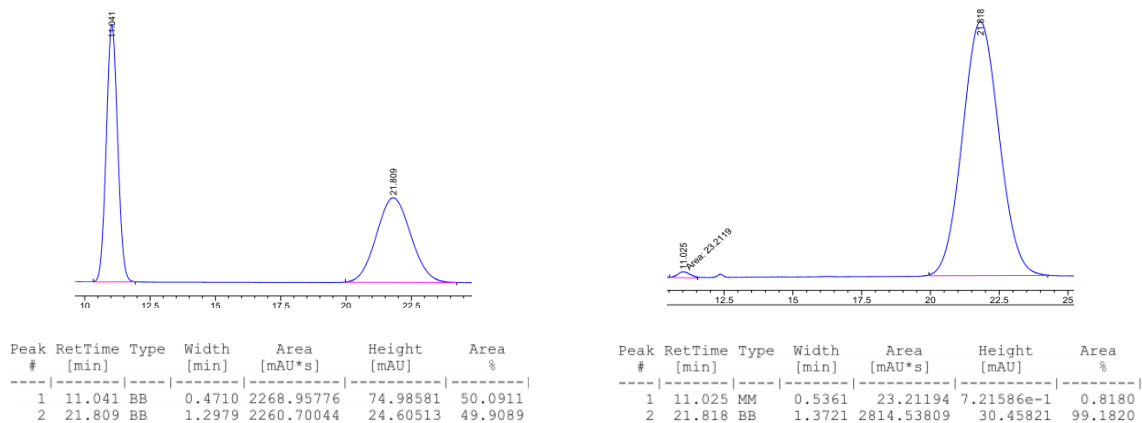

**8h: (S)-2-[1-hydroxy-1-(thiophen-2-yl)ethyl]-5,5-dimethyl-1,3,2-dioxaphosphinane-2-one**

white solid; mp 152.0-153.8°C; The material was determined to be of 97% *ee* by chiral HPLC analysis [Daicel Chiralpak AS-H, *n*-hexane/*i*-PrOH = 80/20, 0.5 mL/min;  $t_r$  (major) = 74.36 min (*S*),  $t_r$  (minor) = 80.74 min (*R*)];  $[\alpha]_D^{20} = -63.0^\circ$  ( $c = 0.57$ , CHCl<sub>3</sub>); IR (KBr): 3234, 2967, 1468, 1372, 1224, 1128, 1064, 836 cm<sup>-1</sup>; <sup>1</sup>H NMR (600 MHz, DMSO-d<sub>6</sub>):  $\delta$  0.84 (s, 3H), 1.17 (s, 3H), 1.78 (d,  $J = 15.6$ Hz, 3H), 3.92-4.05 (m, 2H), 4.43-4.45 (m, 2H), 6.70 (d,  $J = 18$ Hz, 1H), 7.04 (d,  $J = 18$ Hz, 2H), 7.47(s, 1H); <sup>13</sup>C NMR (150 MHz, DMSO-d<sub>6</sub>):  $\delta$  20.0, 21.4, 26.3, 32.0, 73.9, 75.0, 78.1, 78.5, 124.4, 125.2, 126.9, 147.8; MS (EI) ( $m/z$ ): 276 (M<sup>+</sup>); Anal. Calcd. for C<sub>11</sub>H<sub>17</sub>O<sub>4</sub>PS: C 47.82, H 6.20; Found: C 47.72, H 6.02.

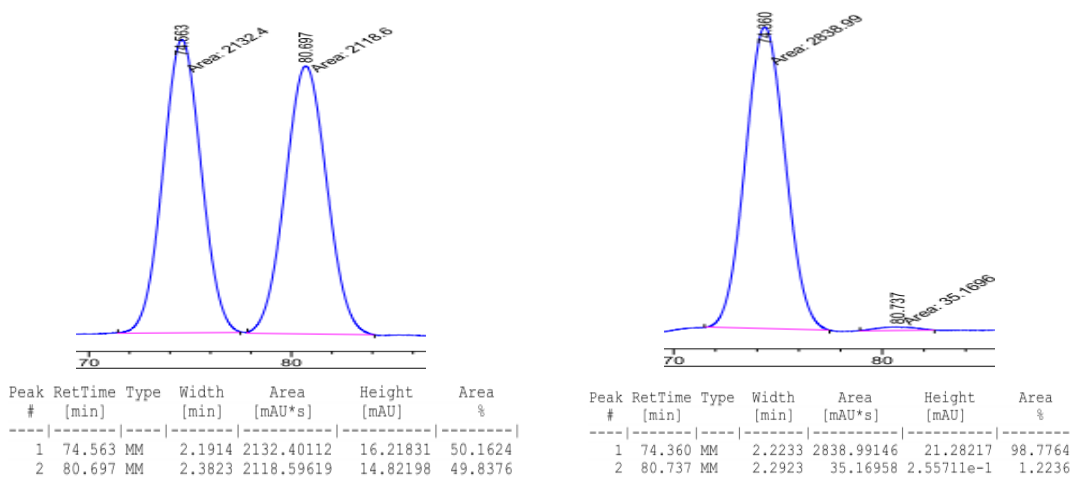

**References**

- 1 D. D. Perrin, W. L. F. Armarego, *Purification of Laboratory Chemicals*, 4<sup>th</sup> ed., Pergamon press, Oxford UK, 1997.
- 2 (a) D. A. Cogan, G.-C. Liu, K. J. Kim, B. J. Backes and J. A. Ellman, *J. Am. Chem. Soc.*, 1998, **120**, 8011; (b) J. Hartung, S. Drees, M. Greb, P. Schmidt, I. Svoboda, H.t Fuess, A. Murso and D. Stalke, *Eur. J. Org. Chem.*, 2003, **13**, 2388.
- 3 (a) S. Kumaraswamy, R. S. Selvi and K. C. Kumara Swamy, *Synthesis*, 1997, 207; (b) C. Muthiah, K. Praveen Kumar, C. Aruna Mani and K. C. Kumara Swamy, *J. Org. Chem.*, 2000, **65**, 3733.

### 3. Copy of $^1\text{H}$ NMR and $^{13}\text{C}$ NMR Spectra

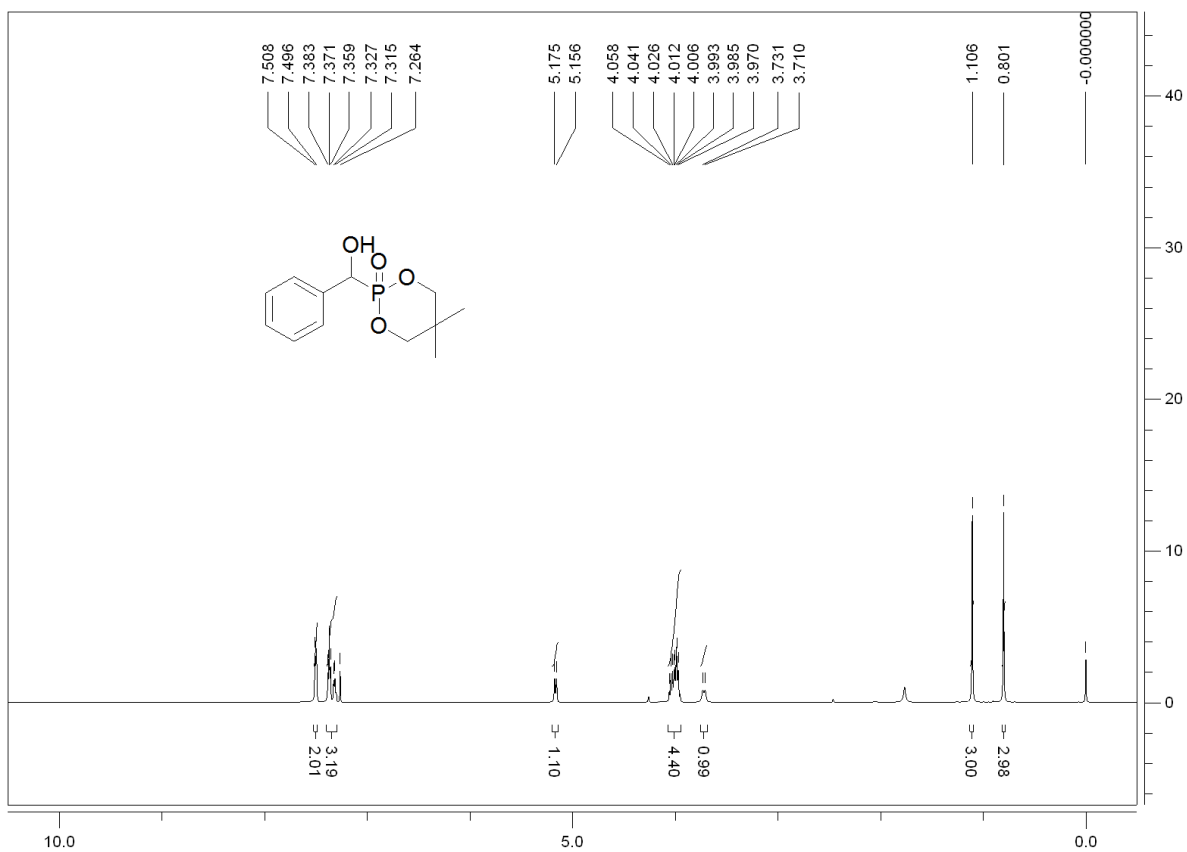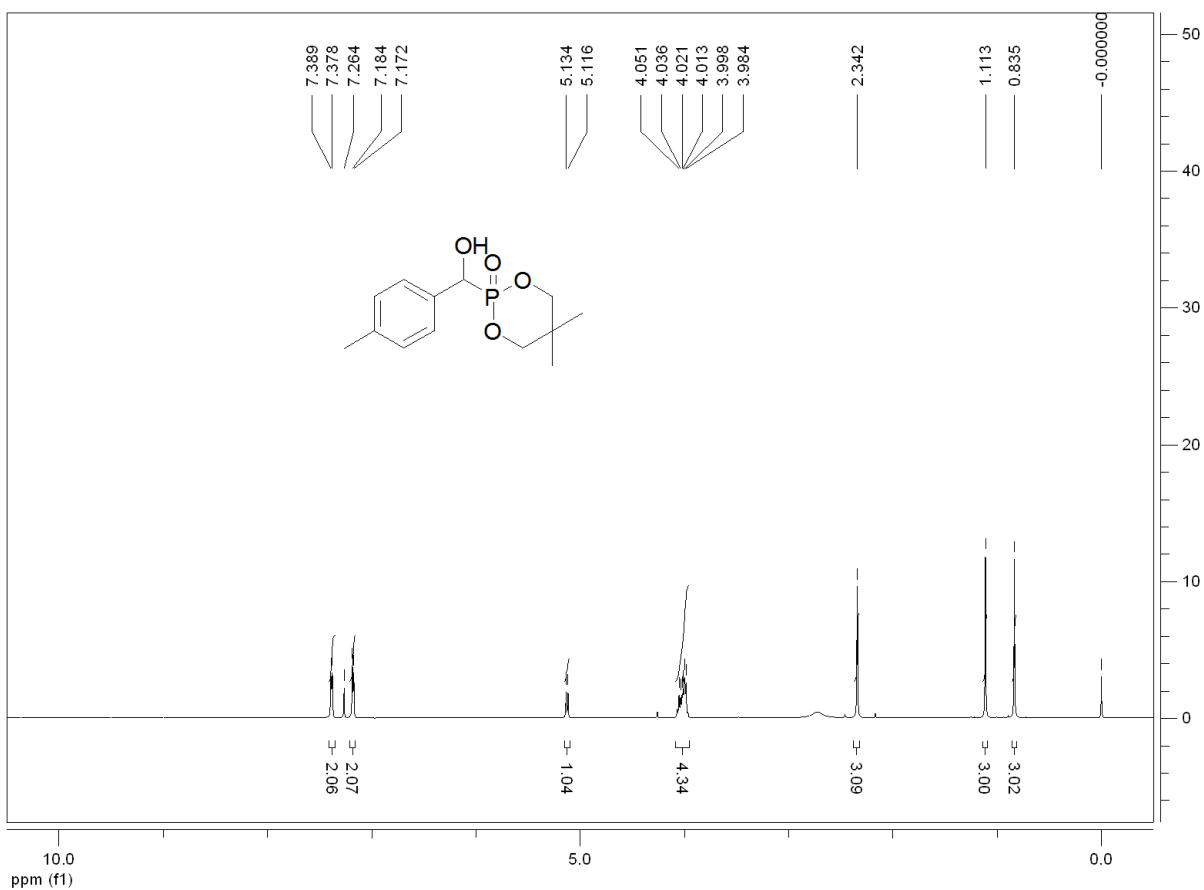

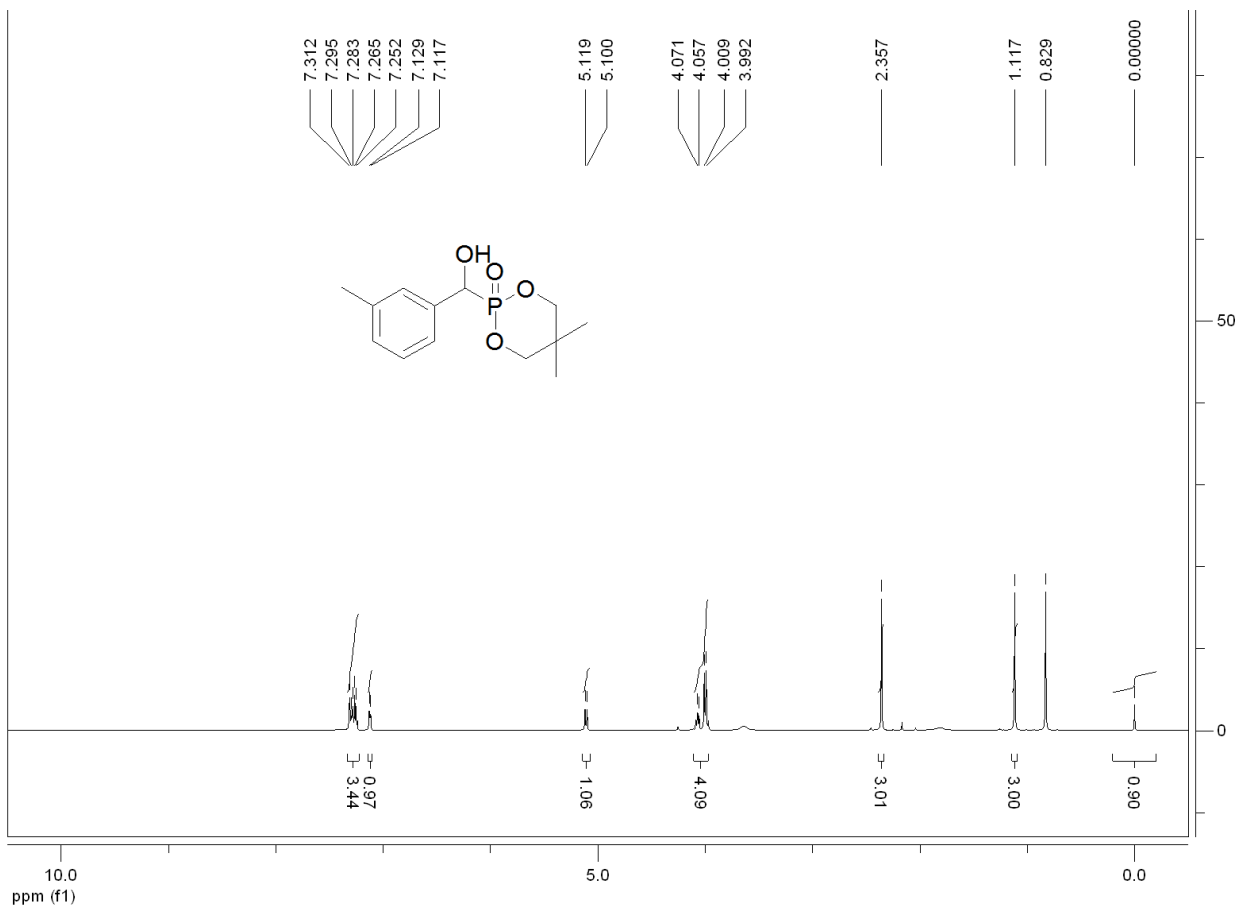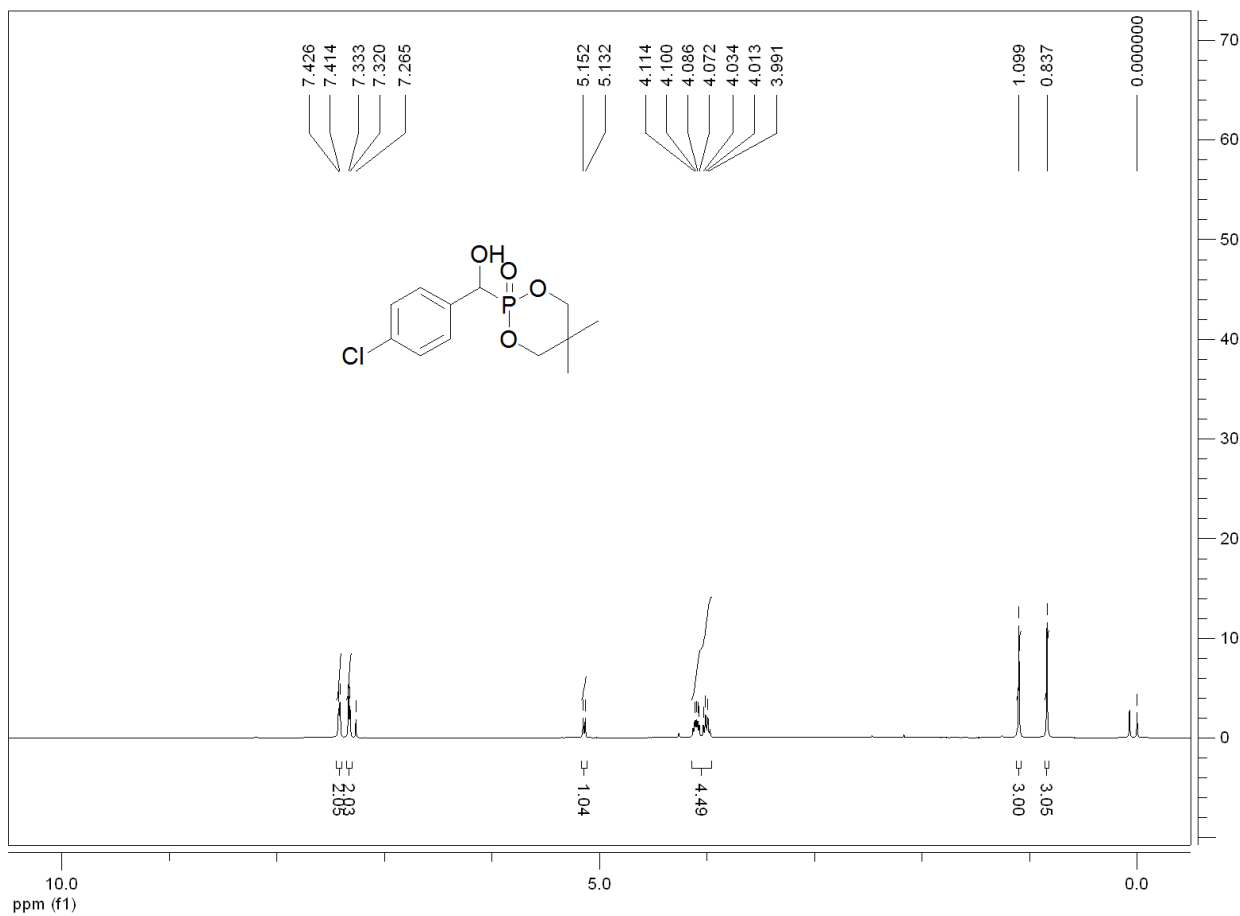

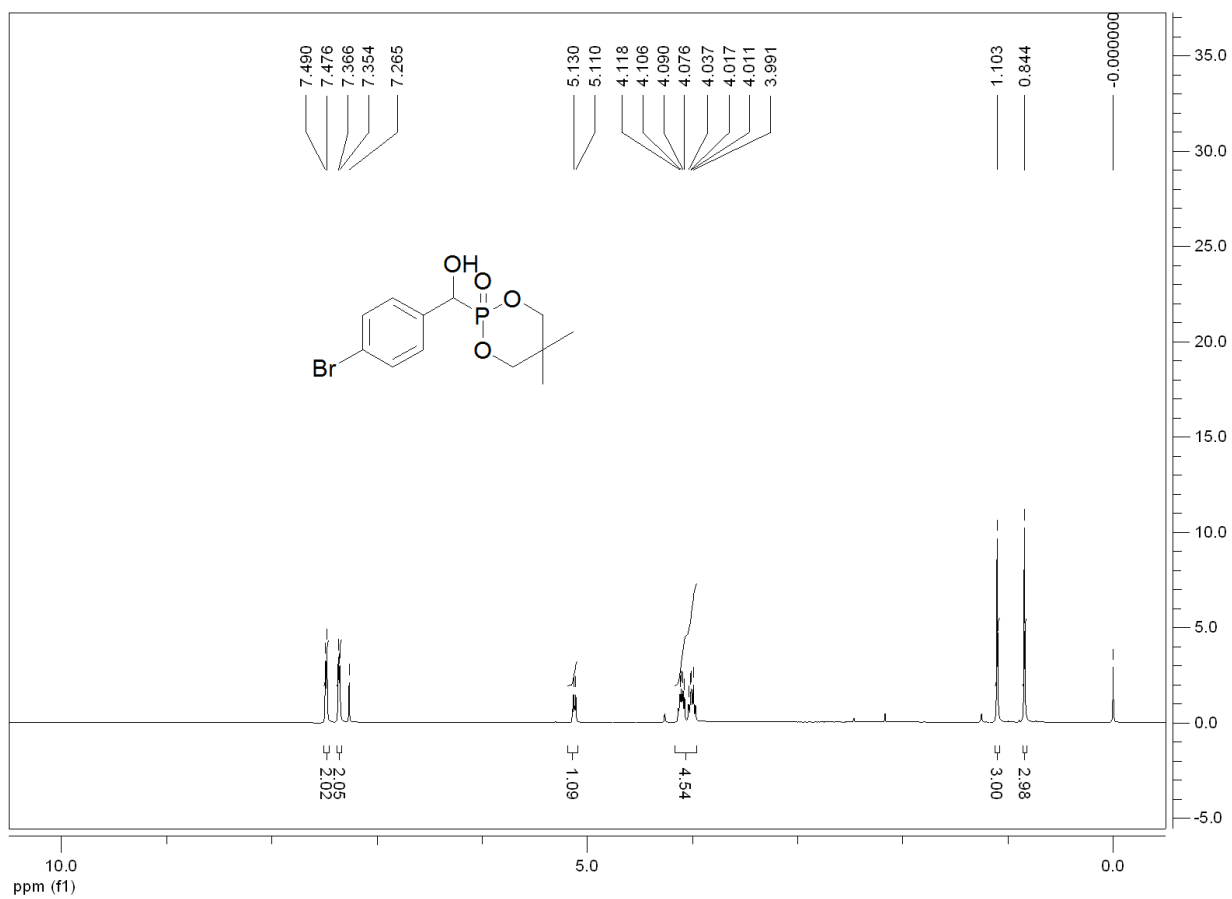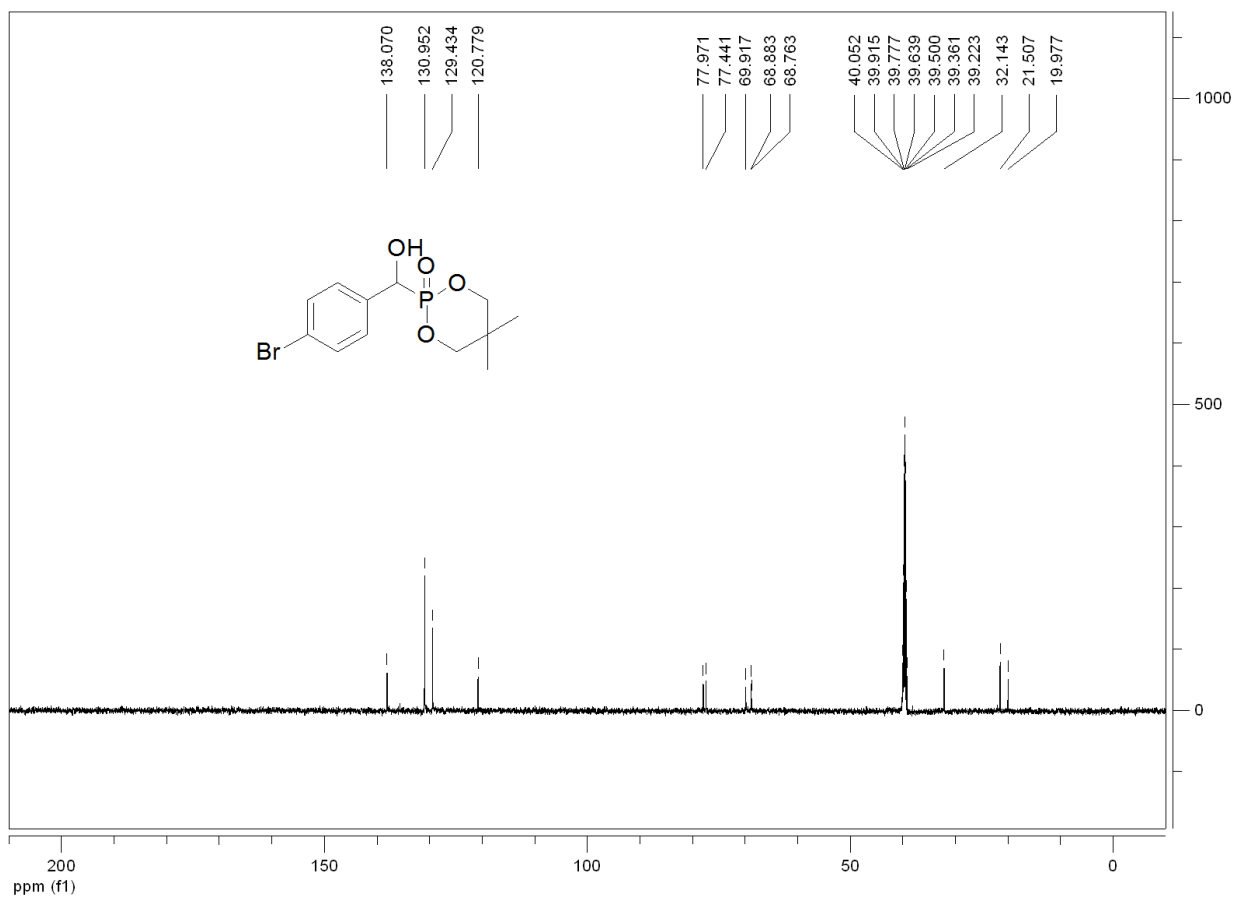

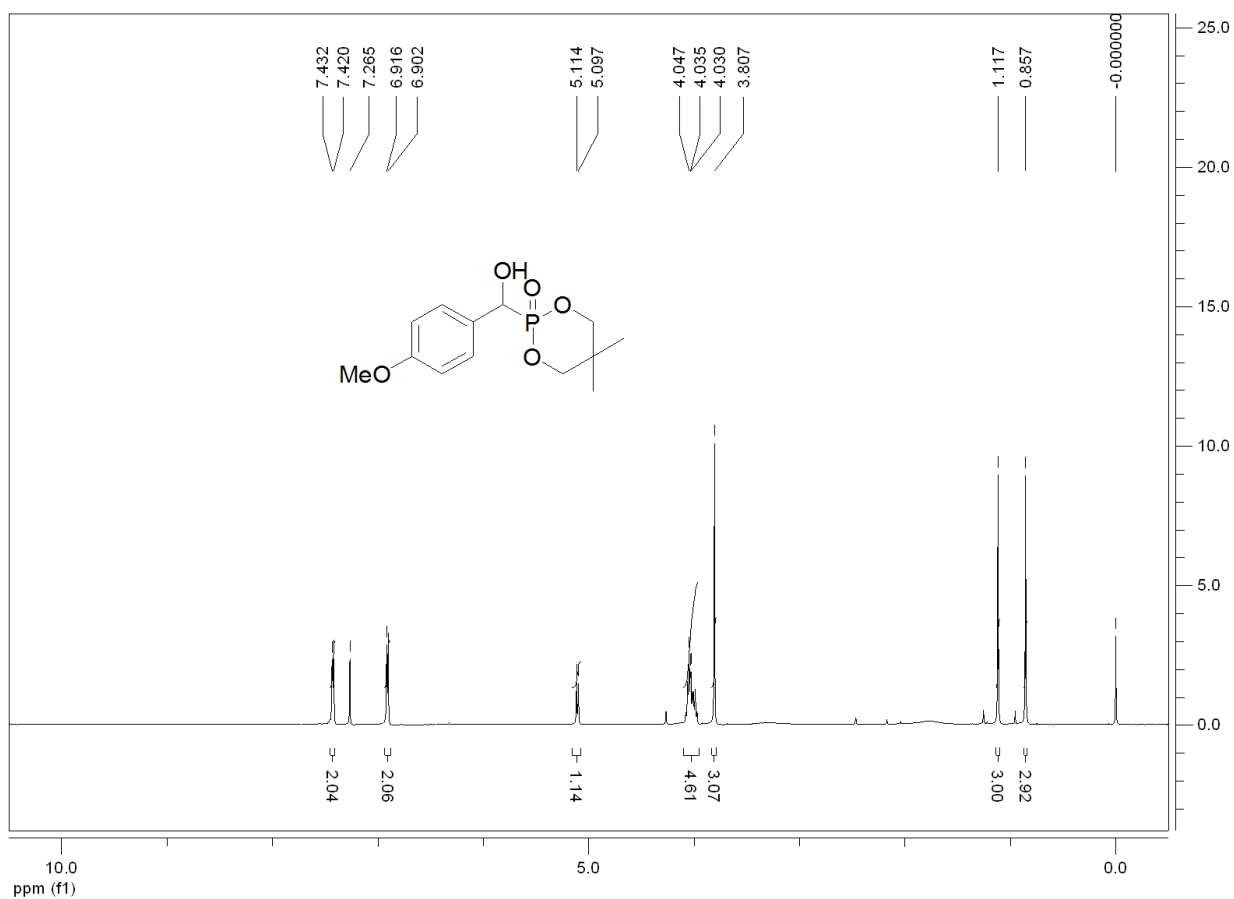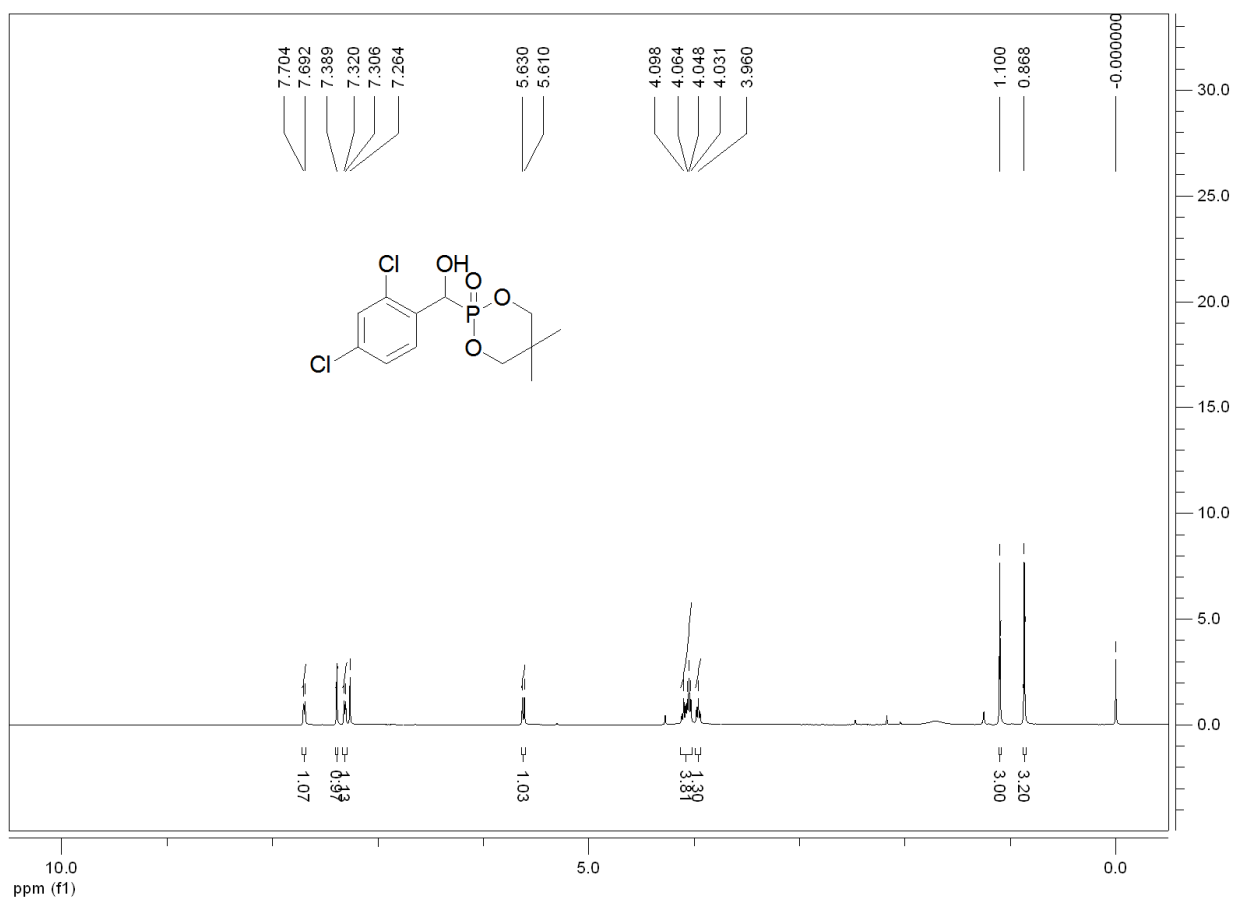



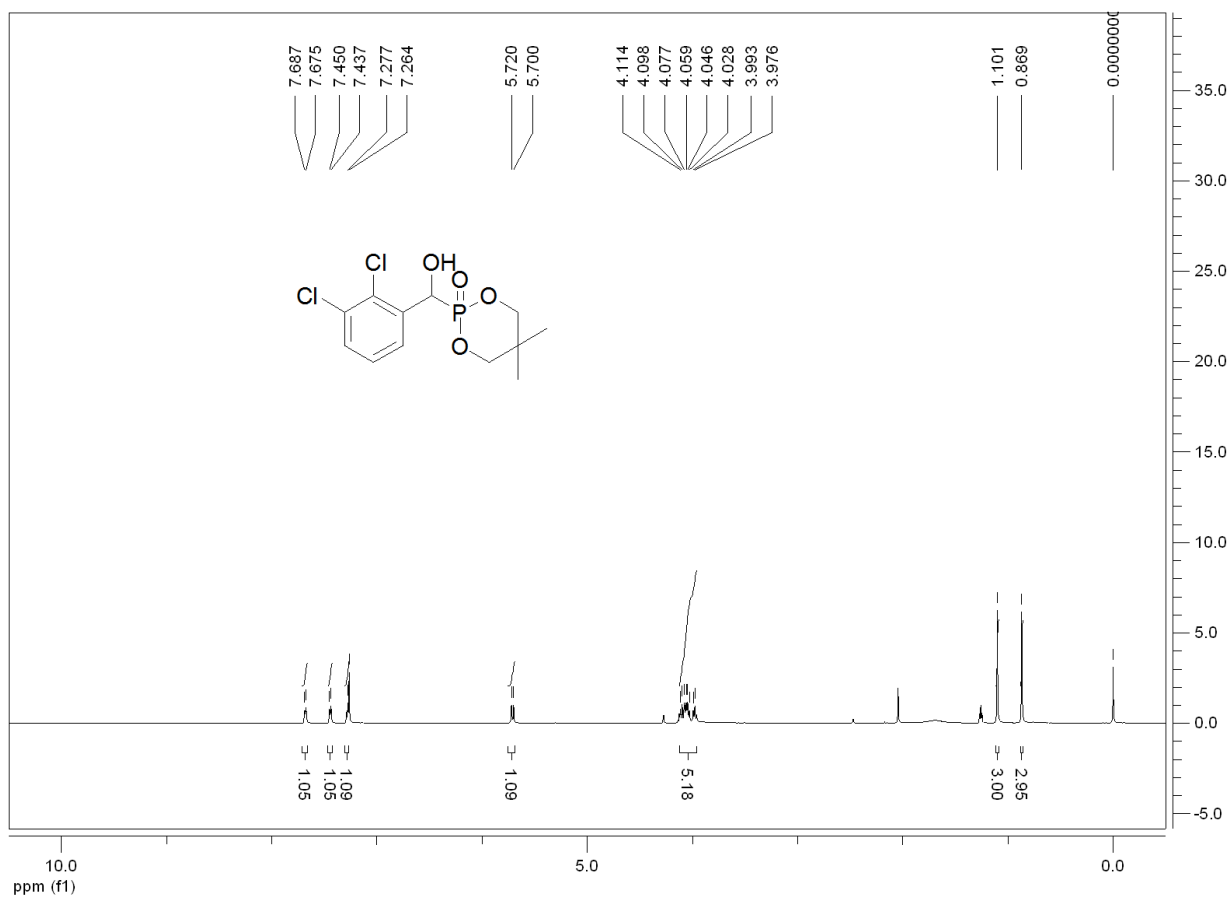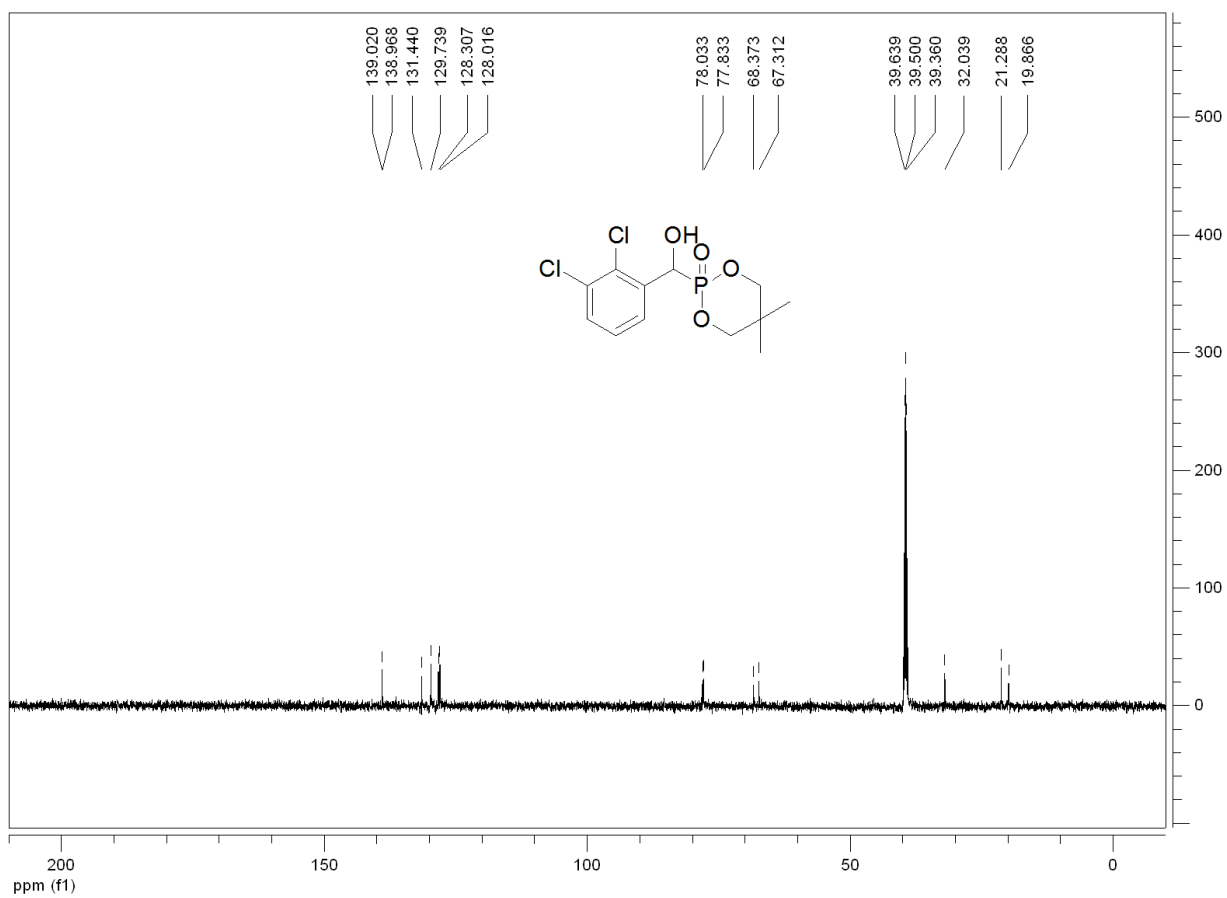

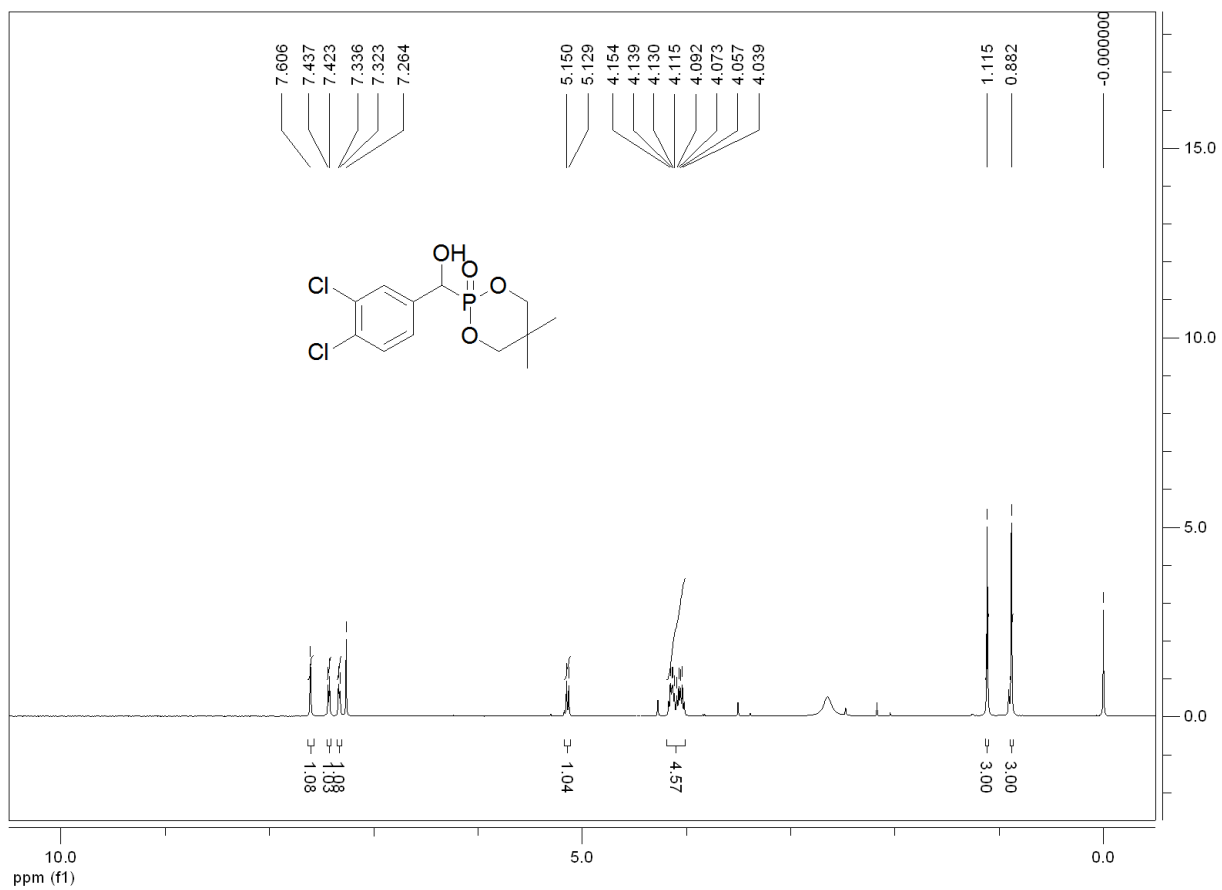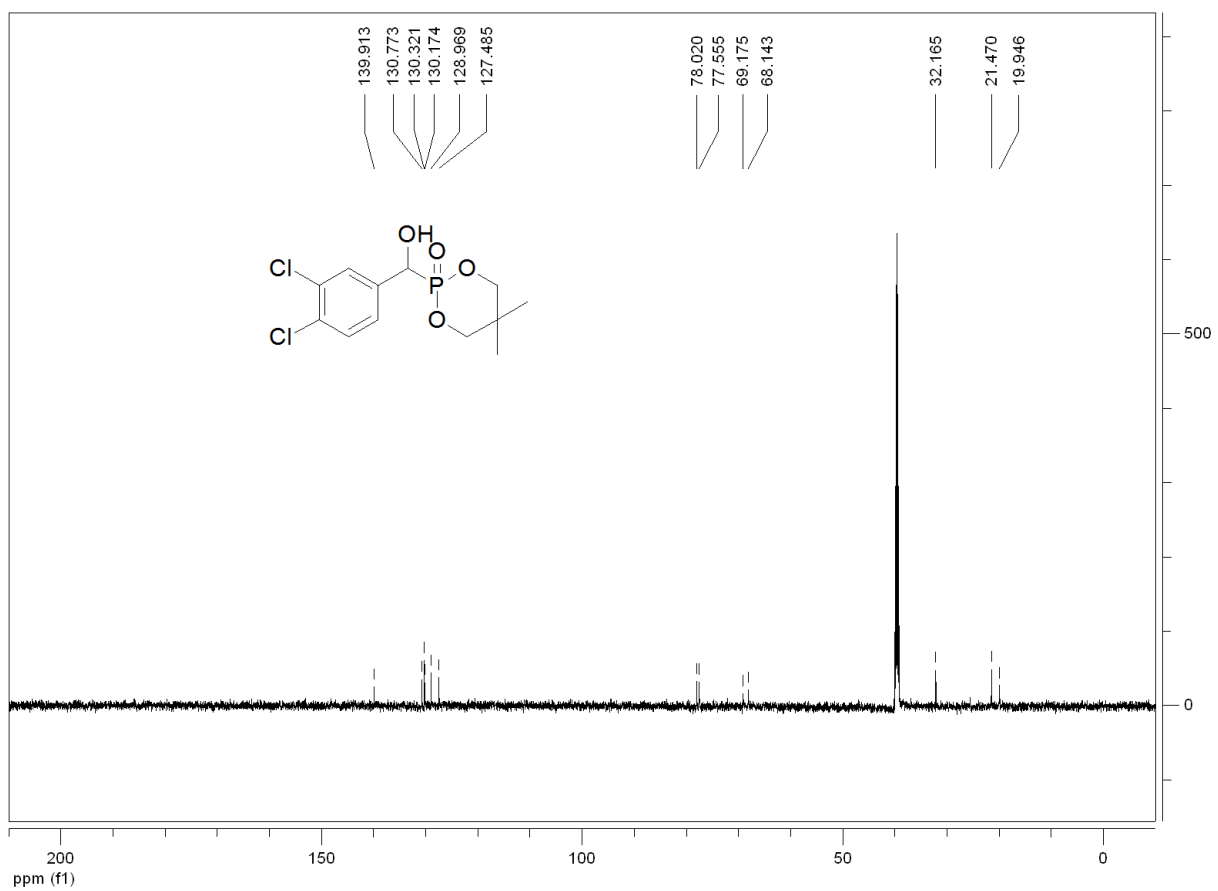

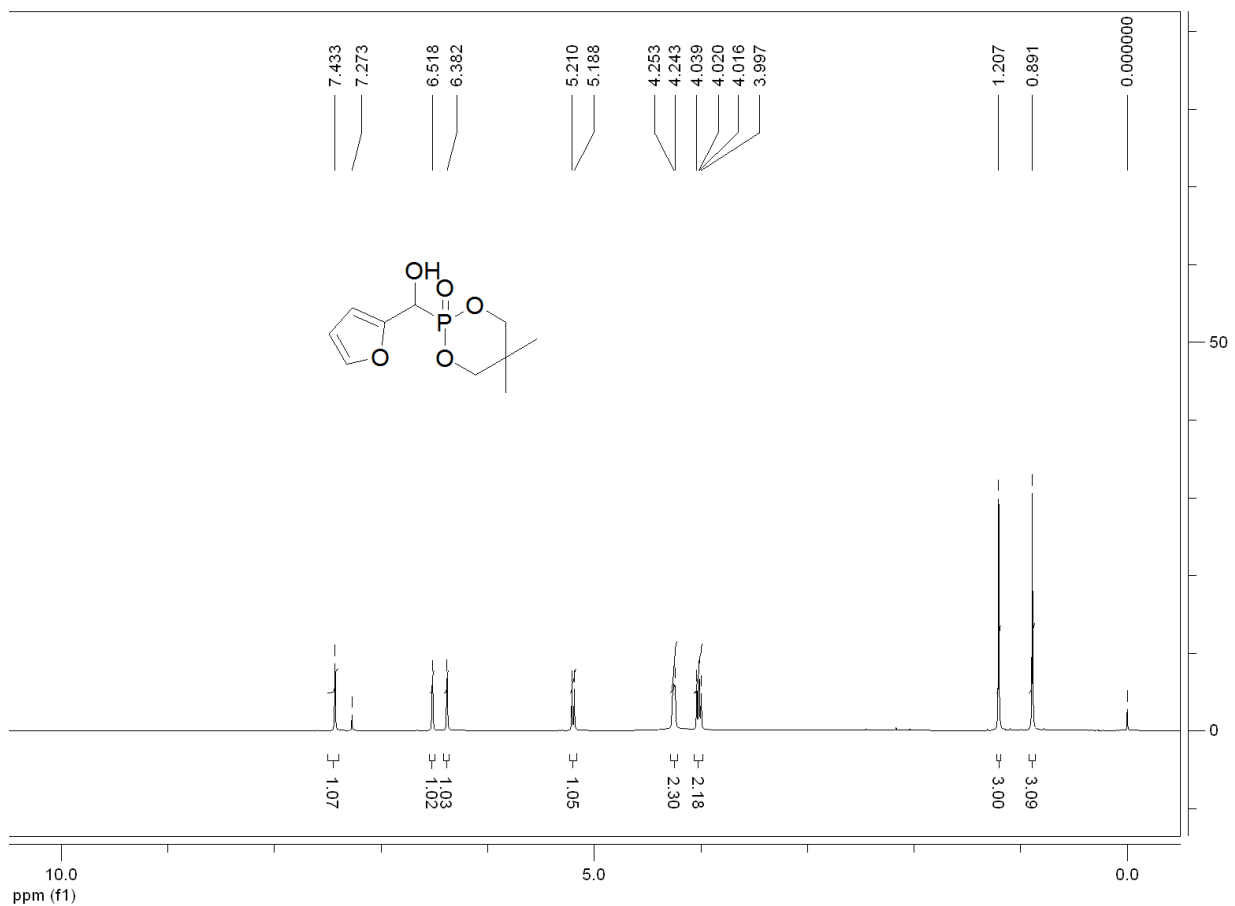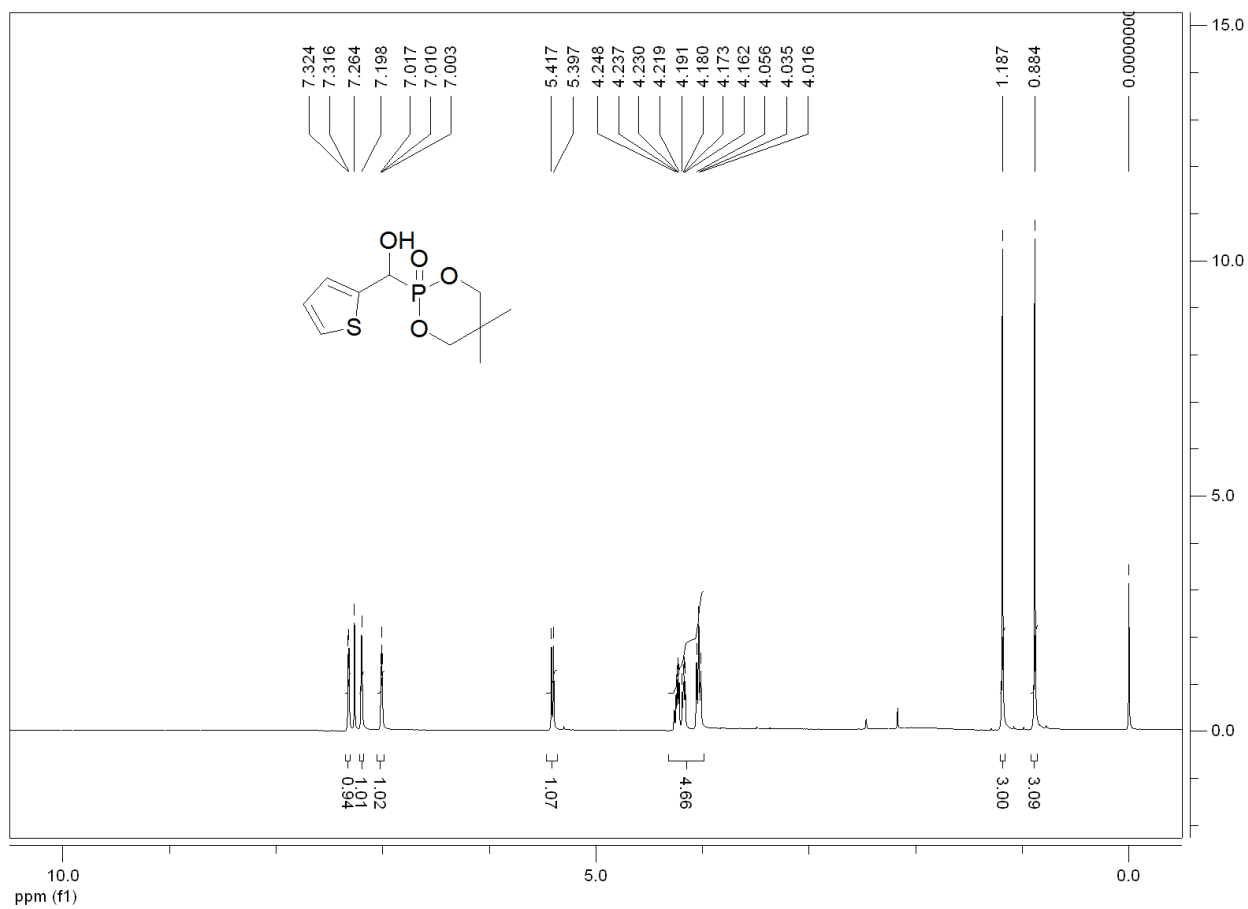

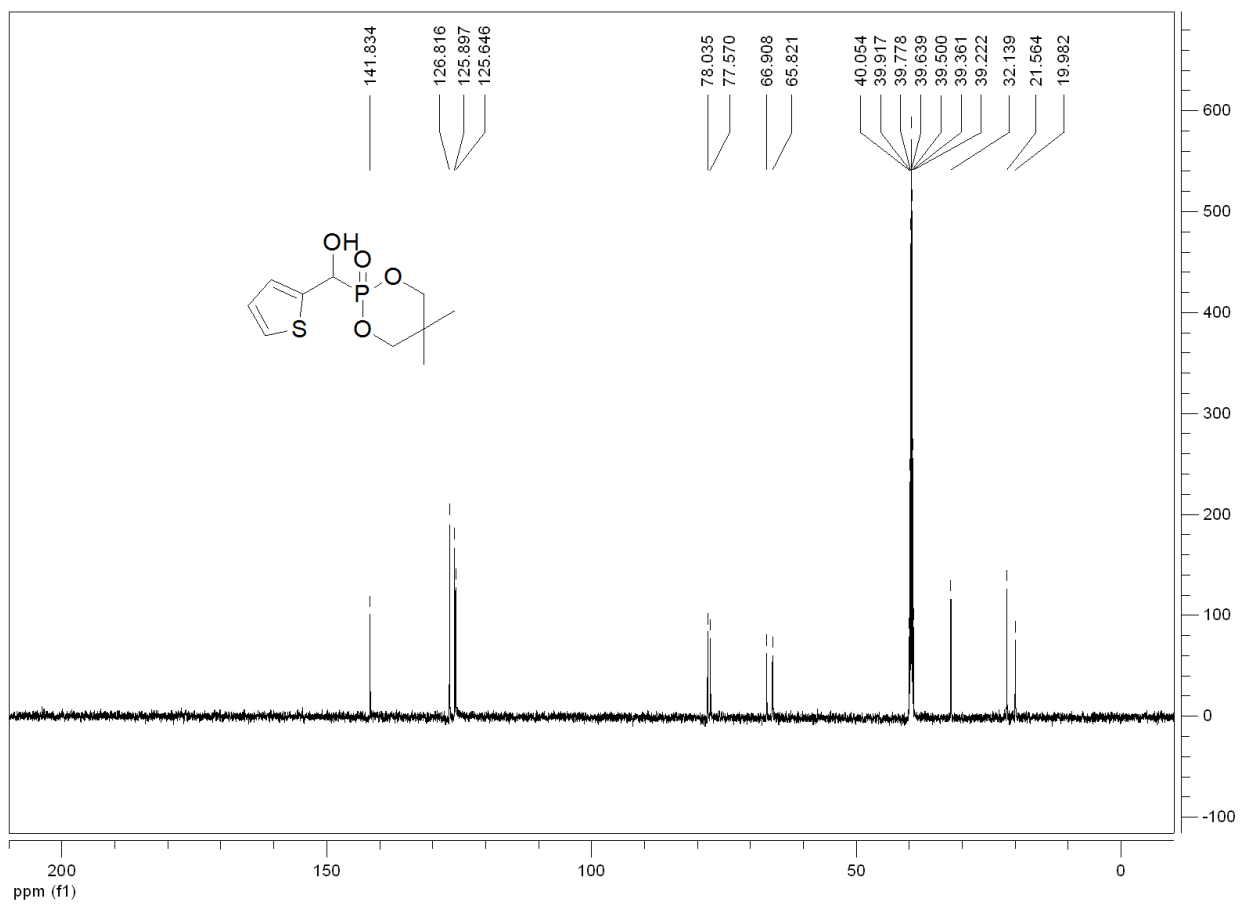

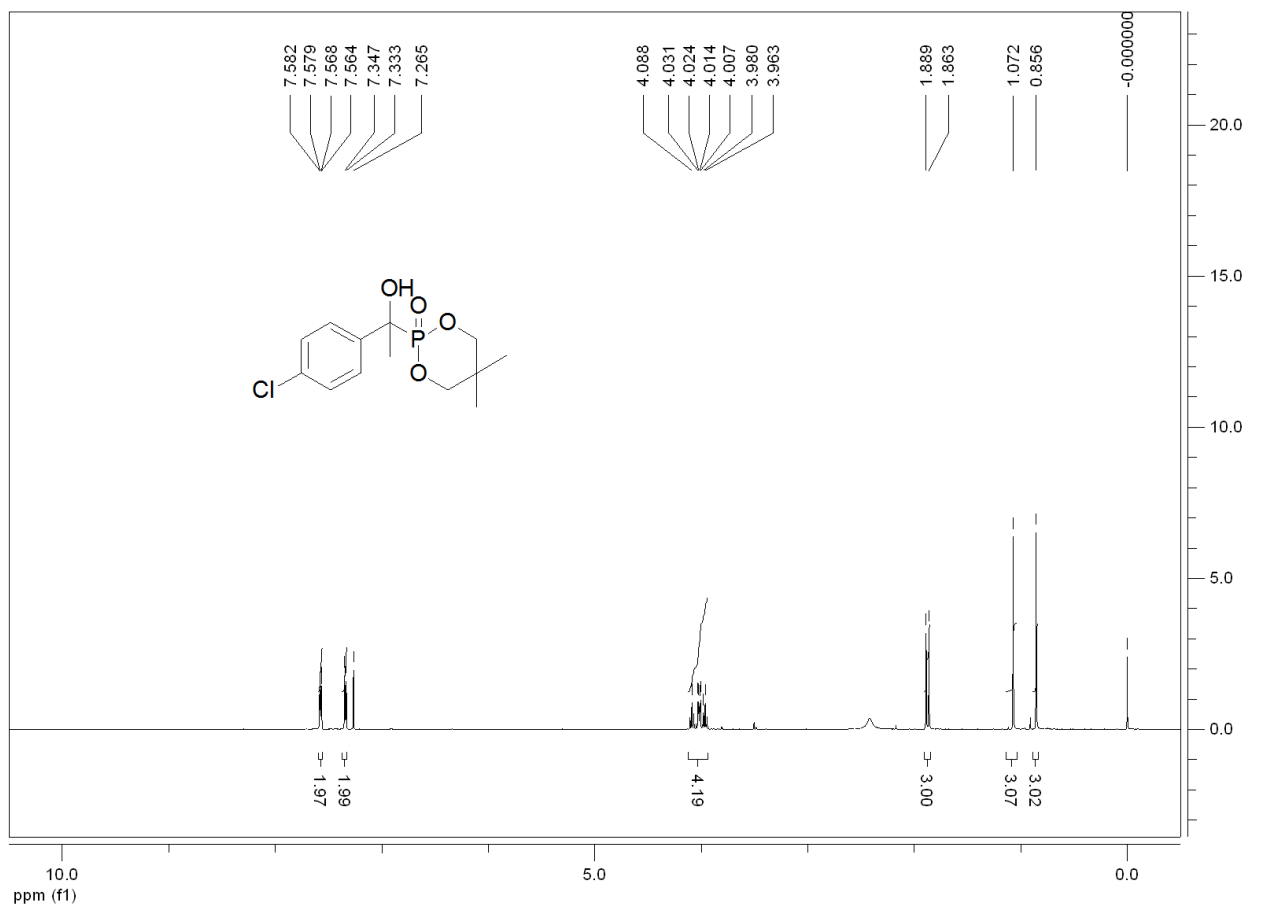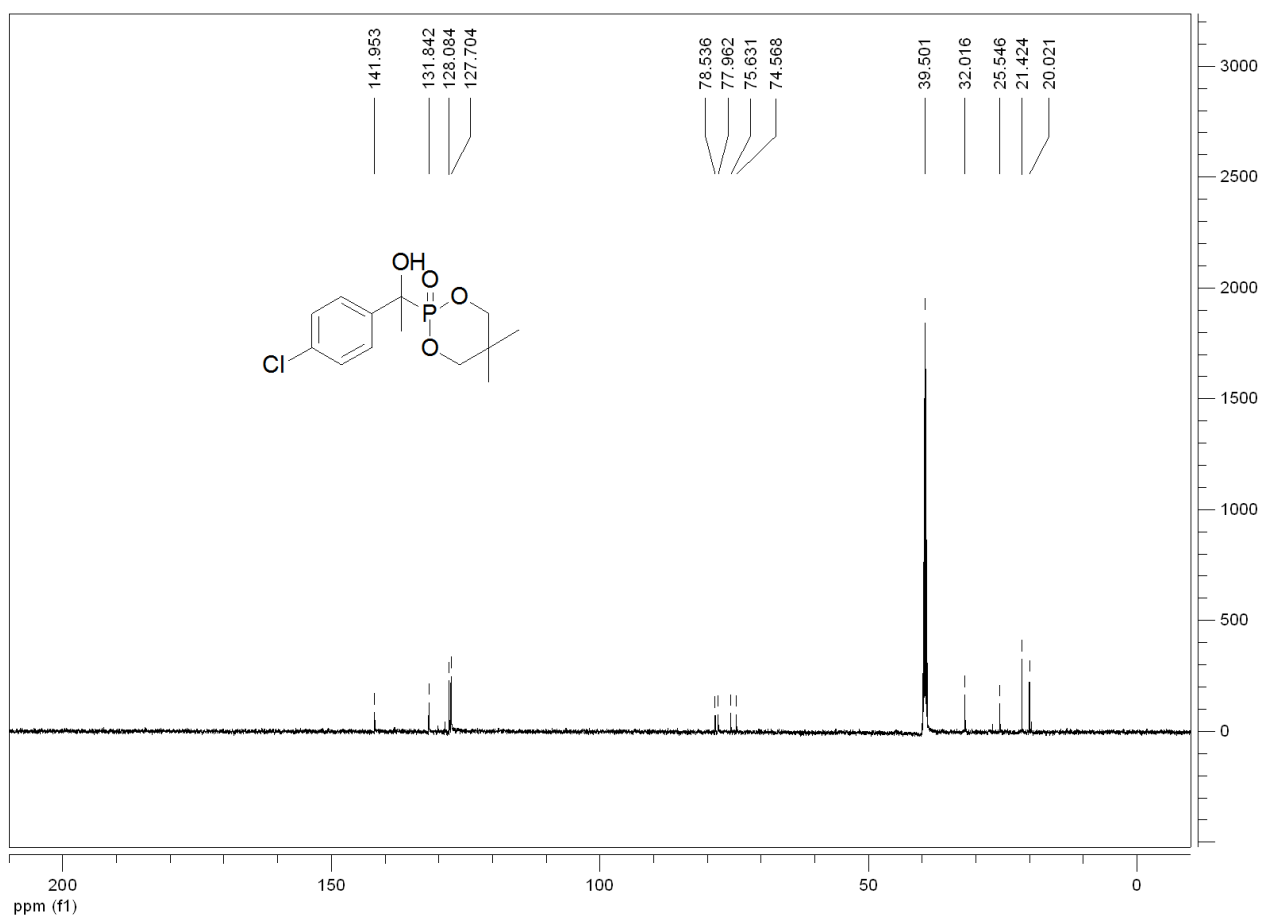

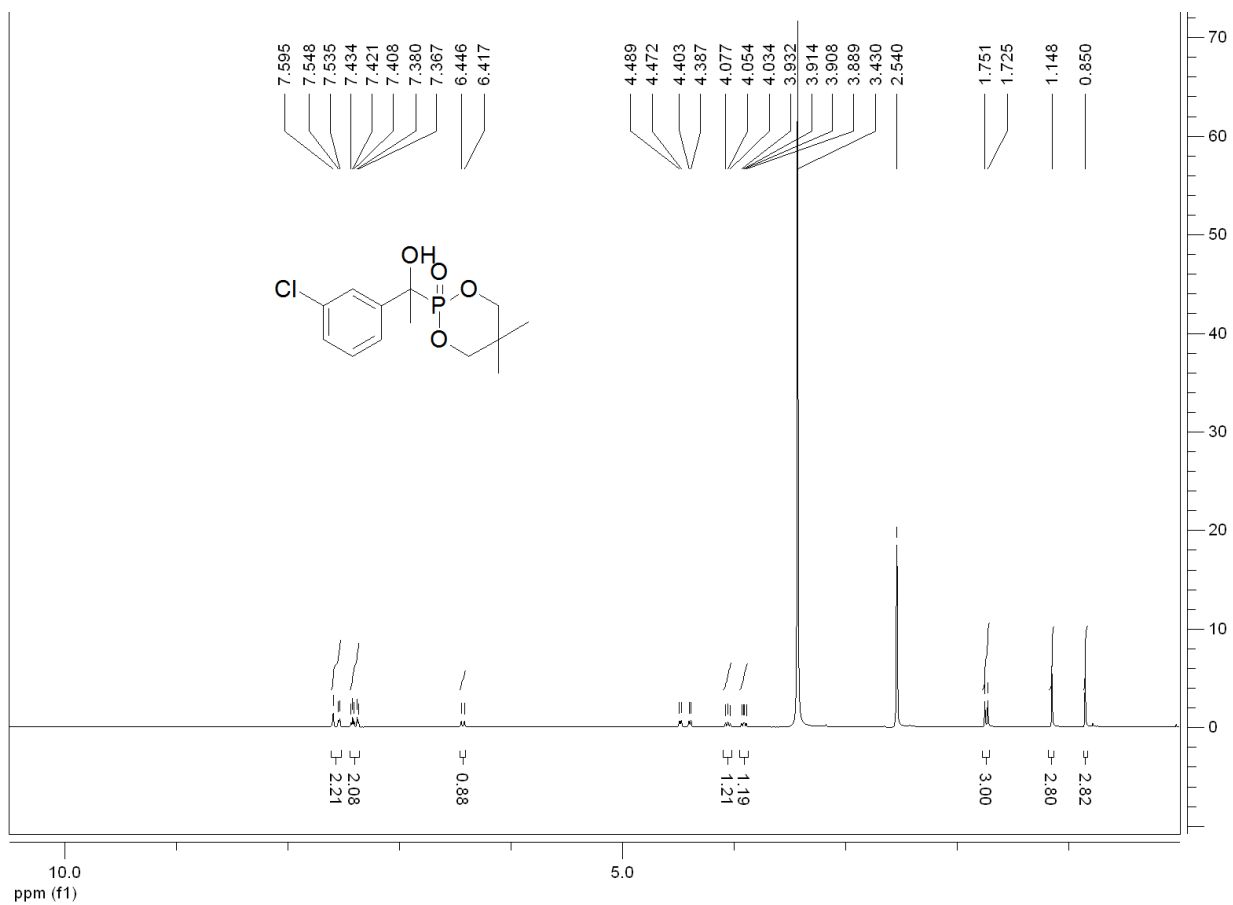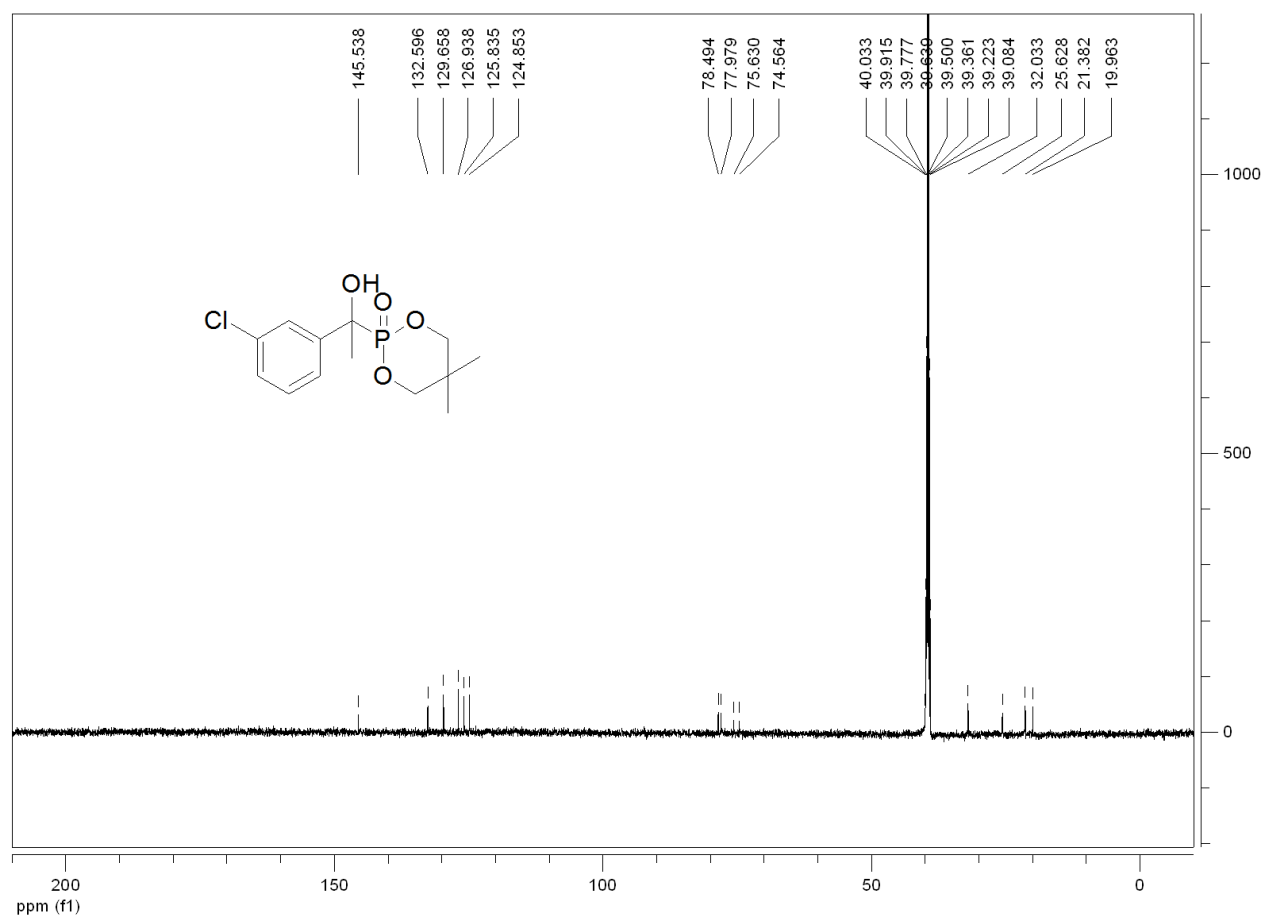

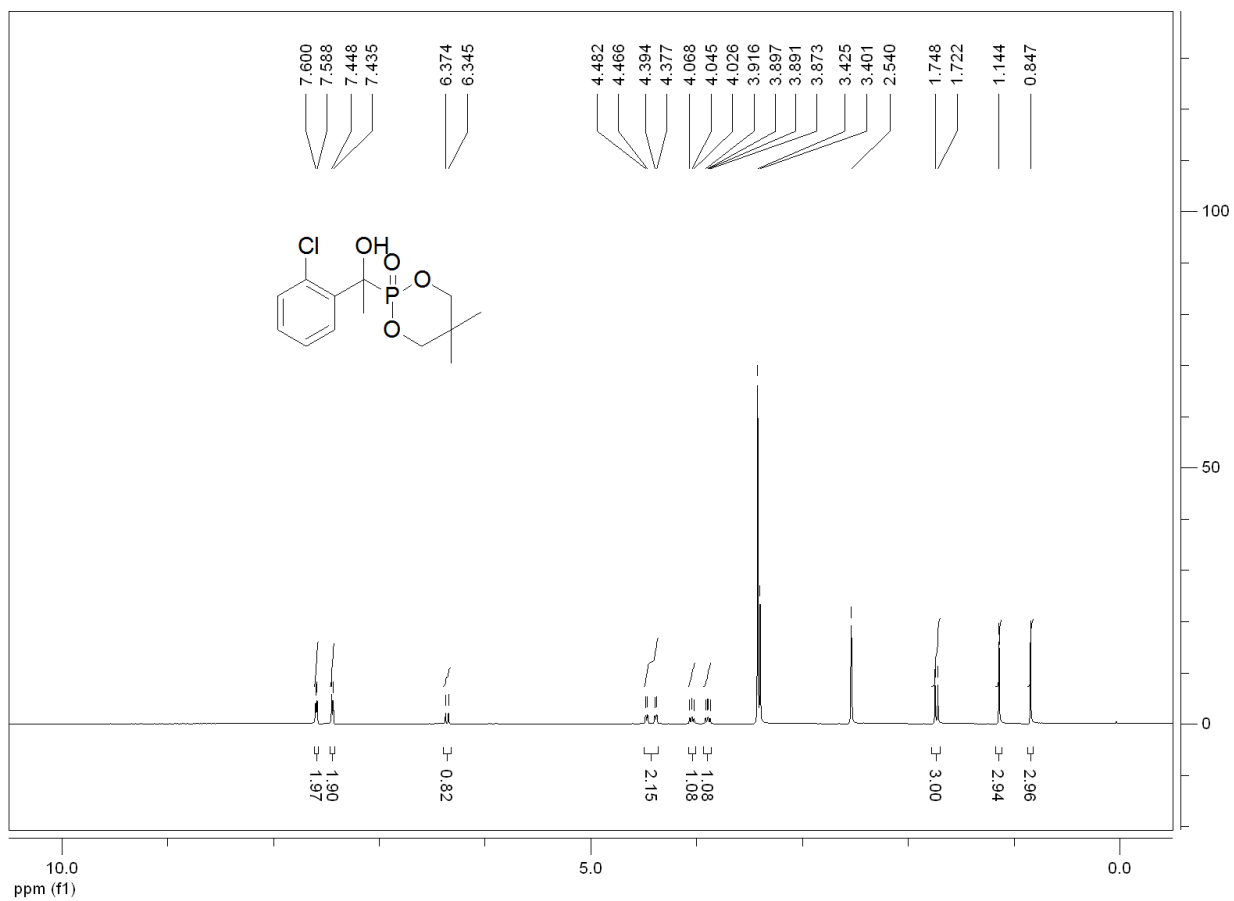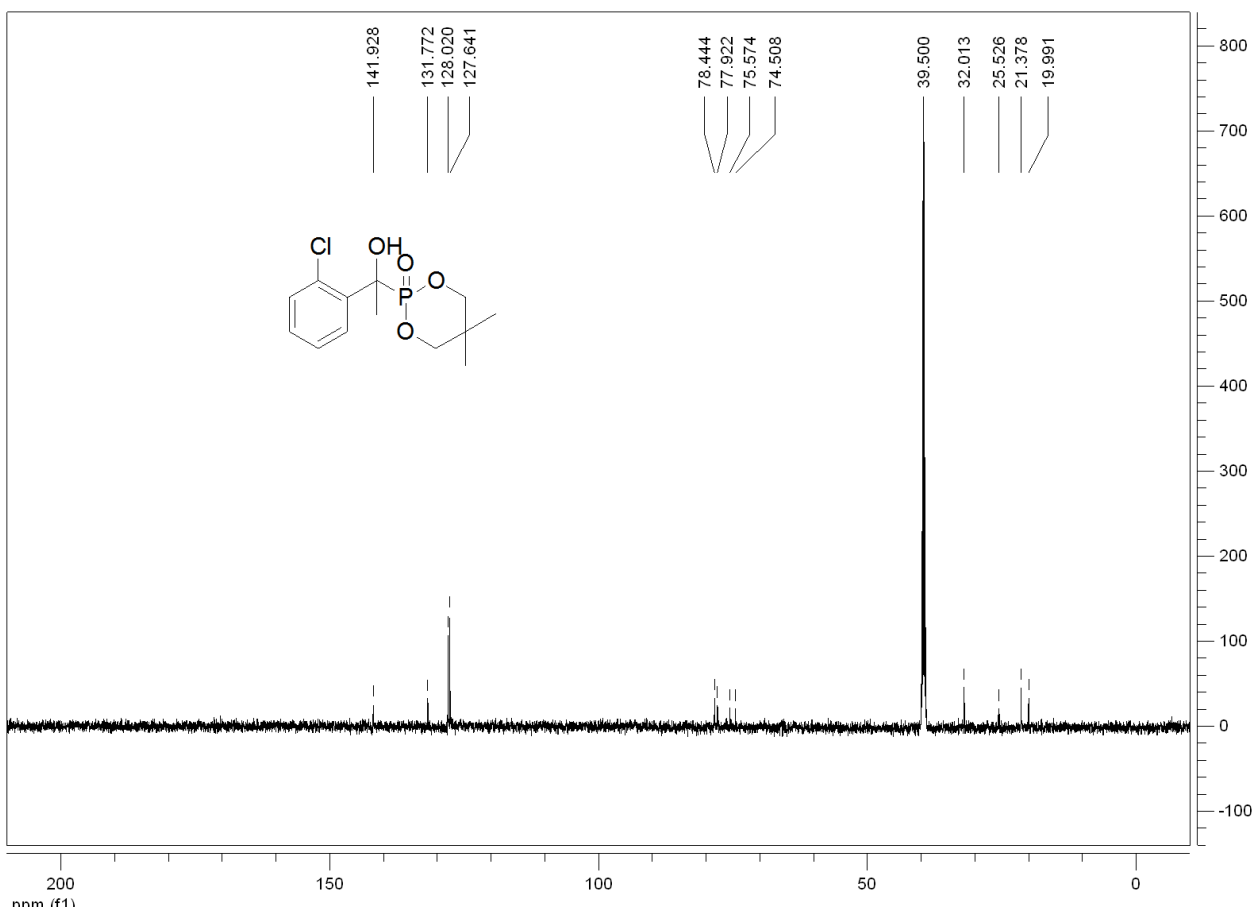

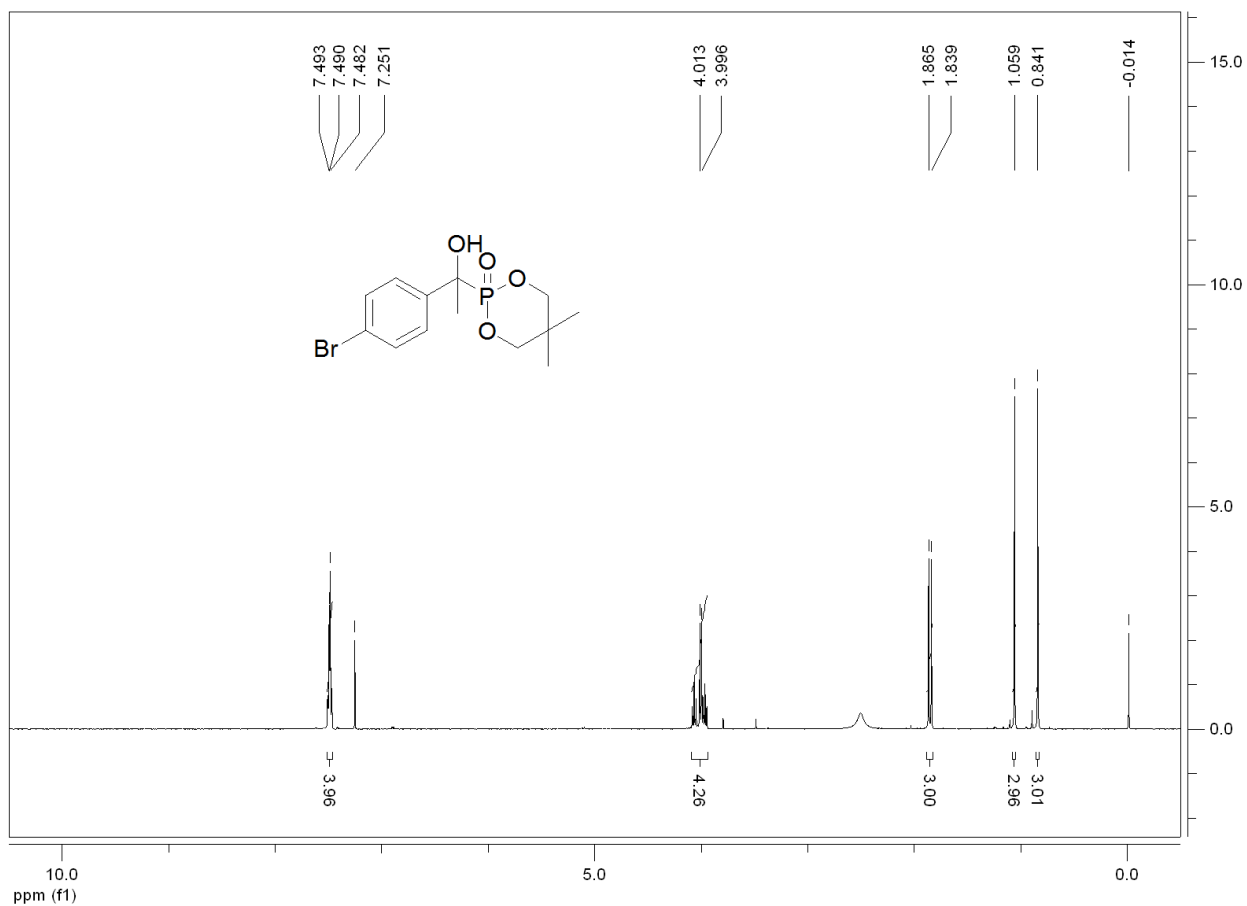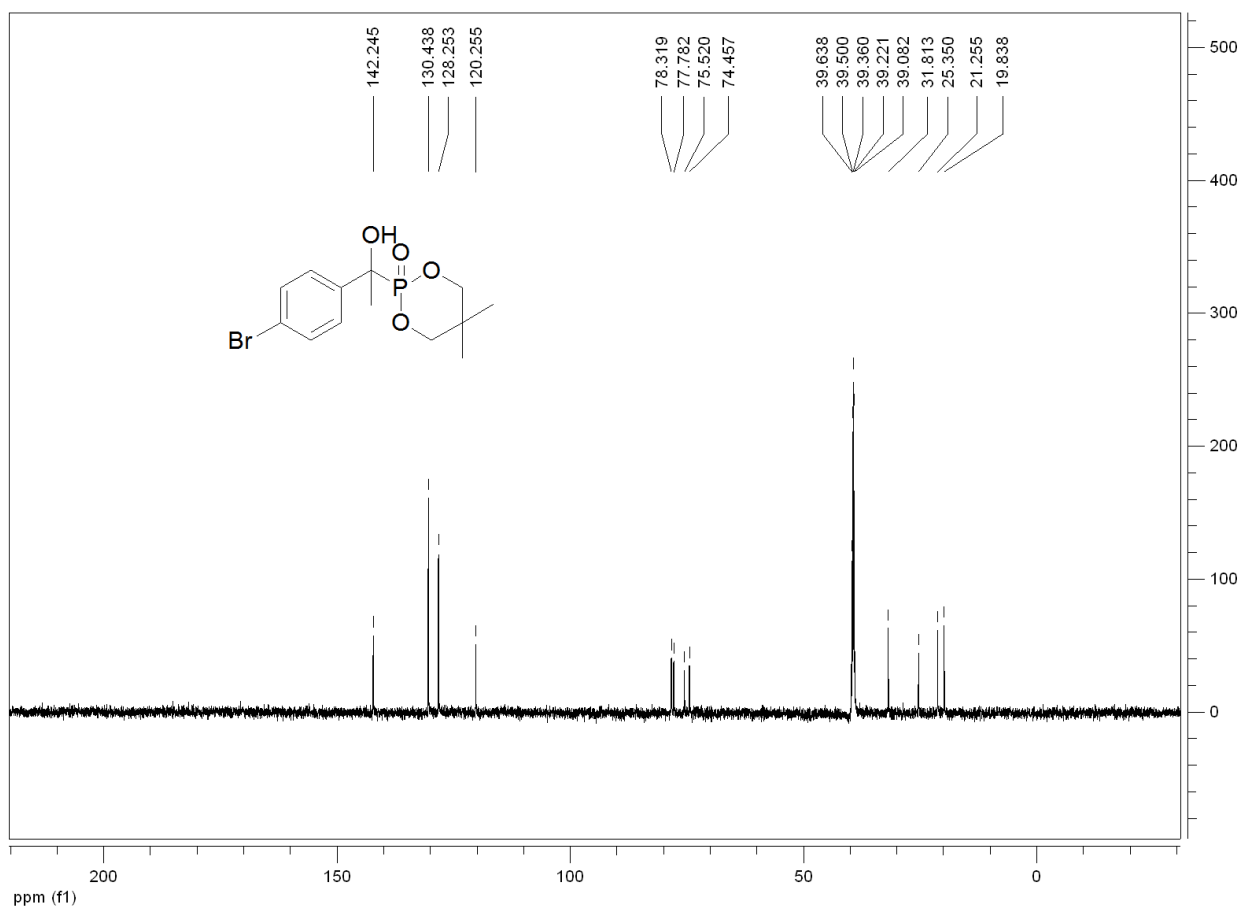



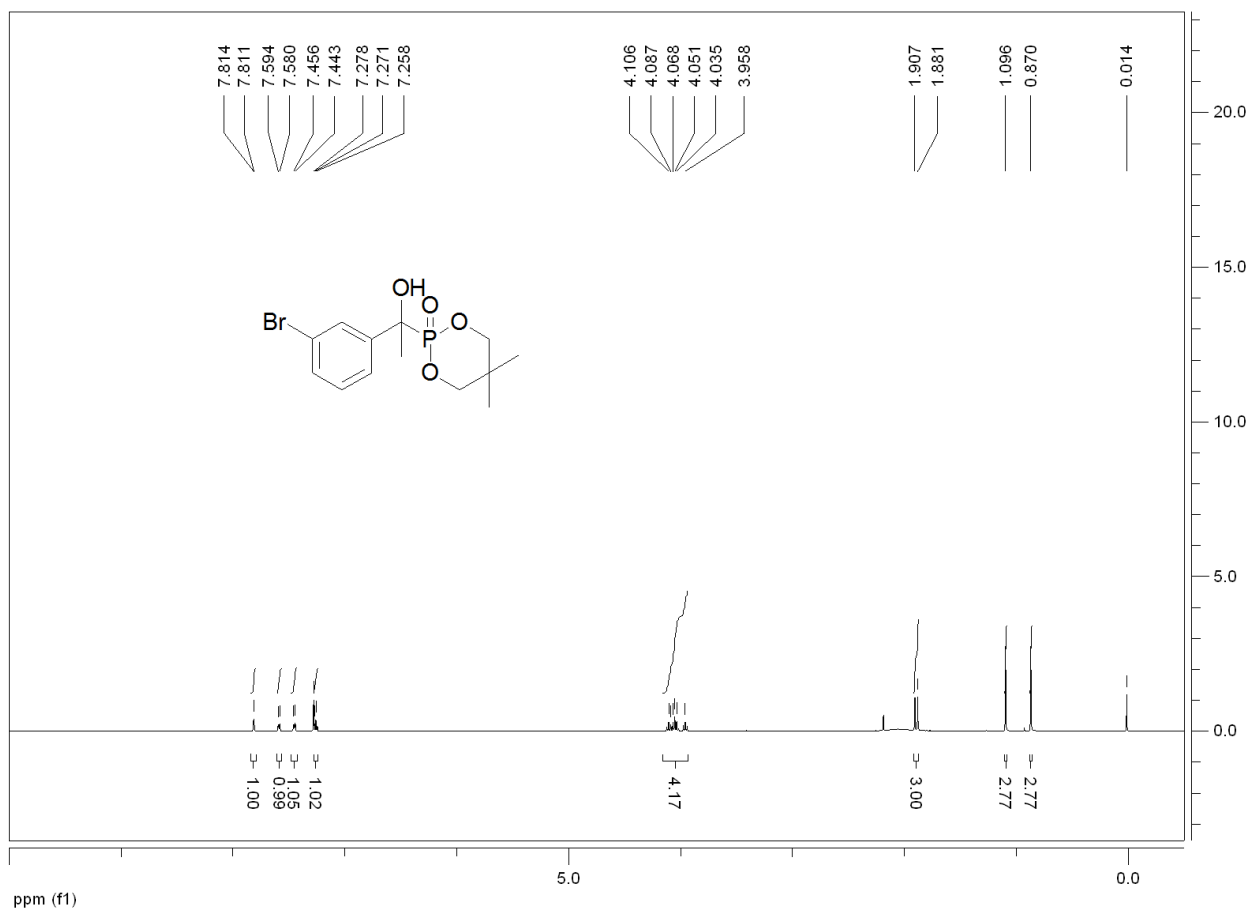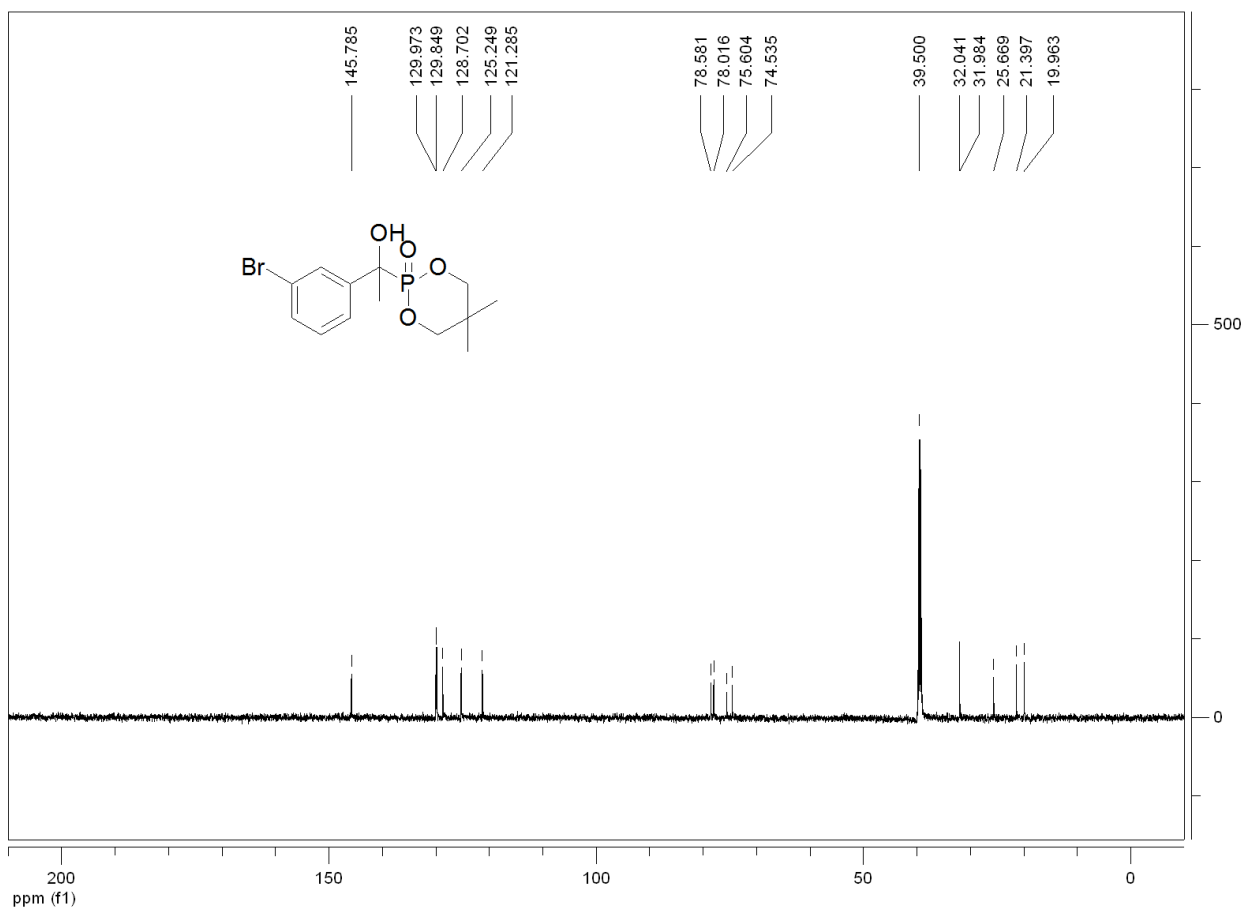

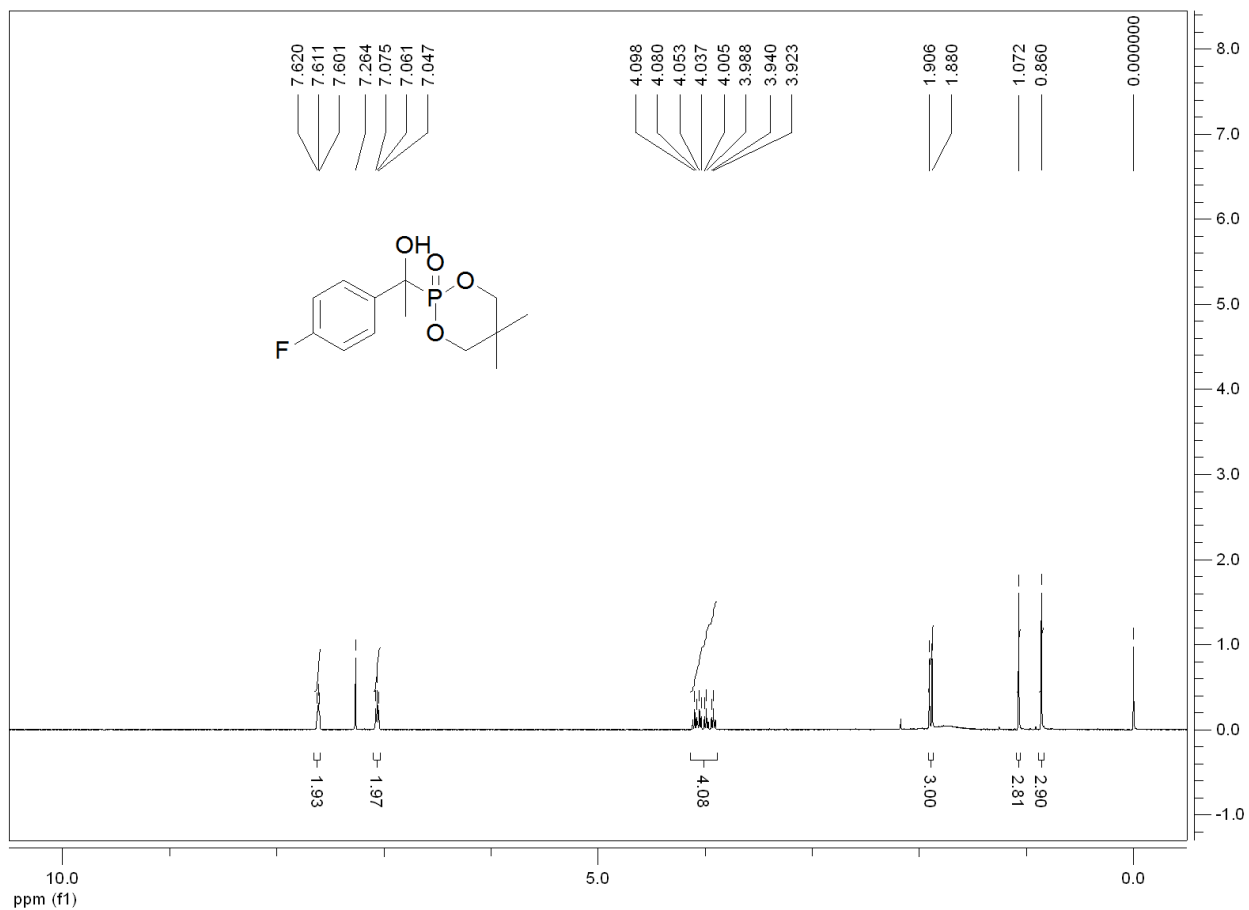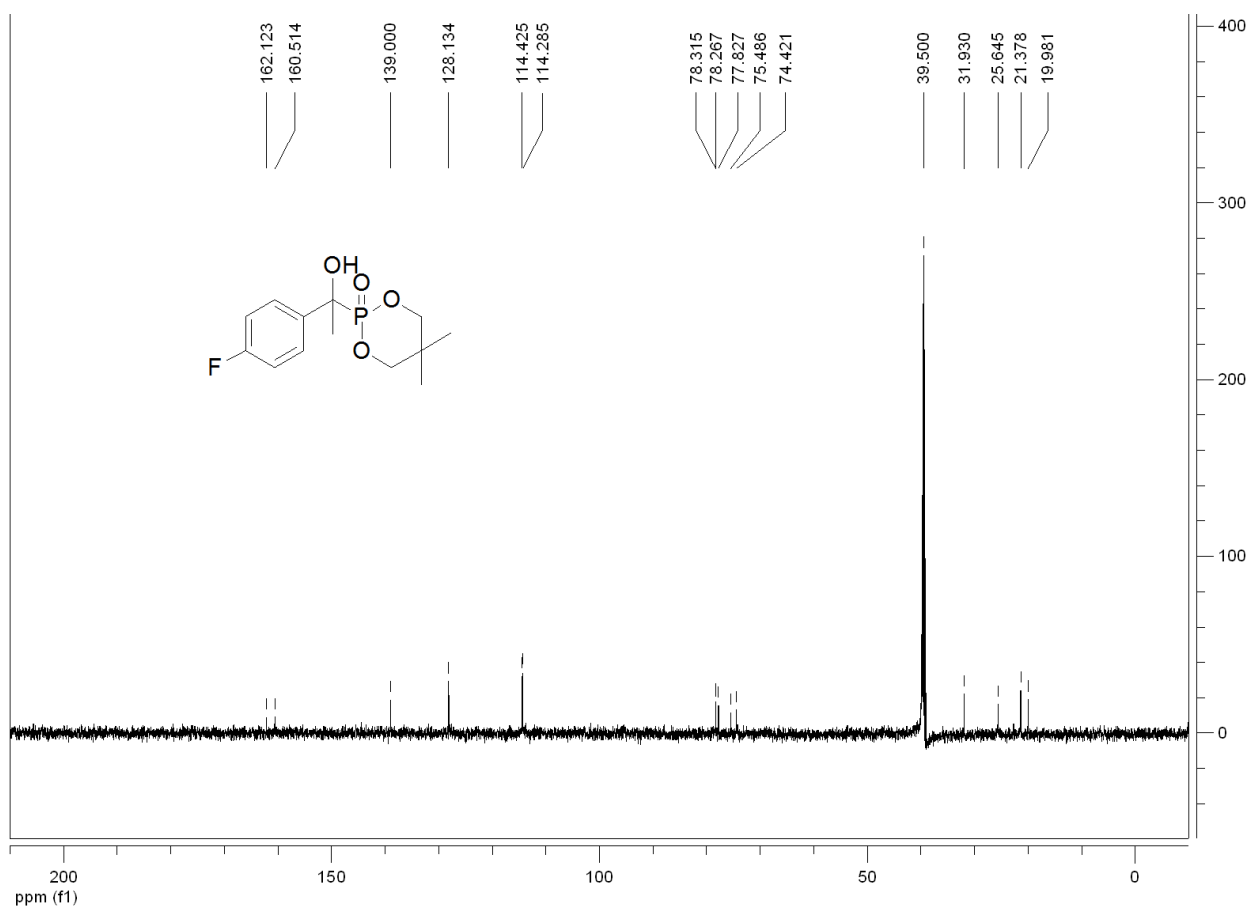

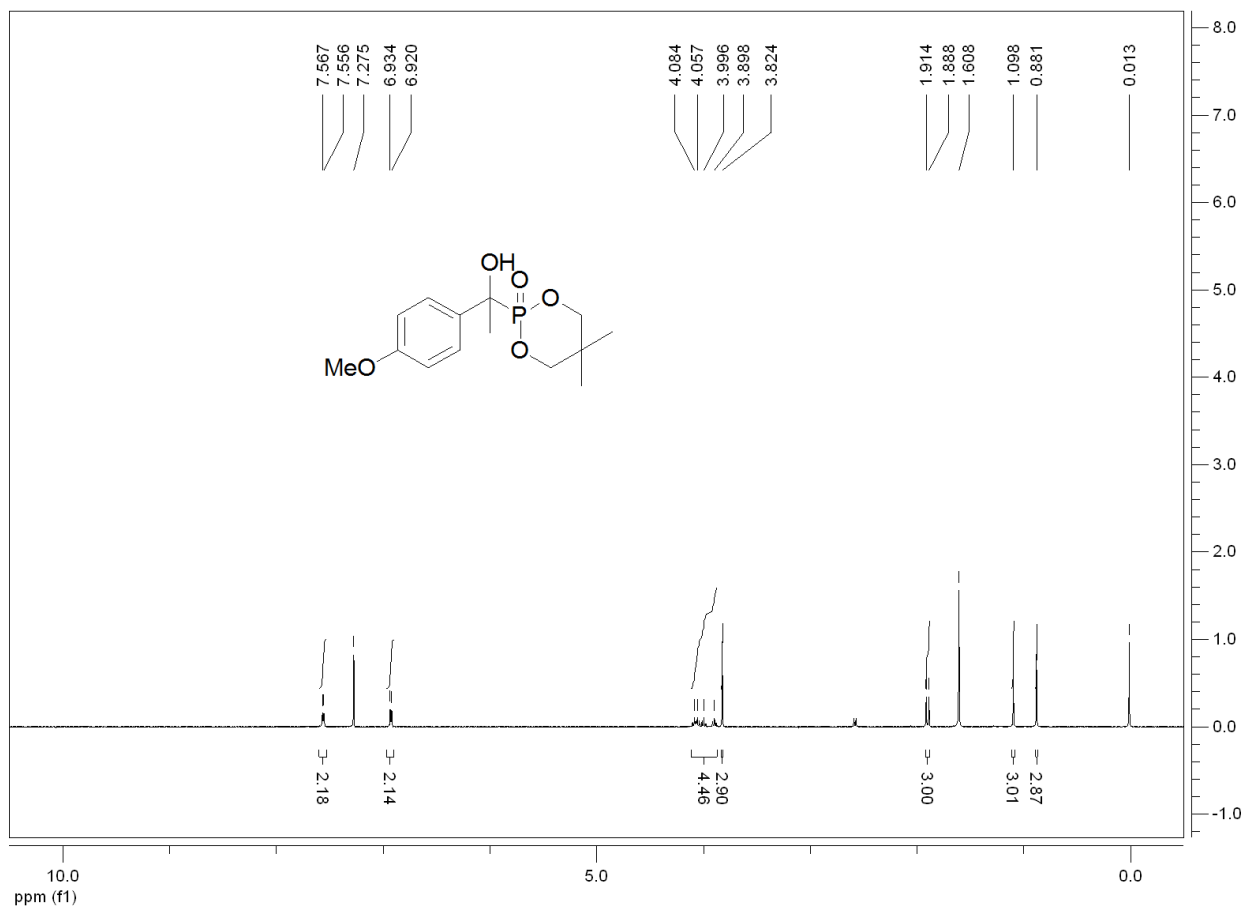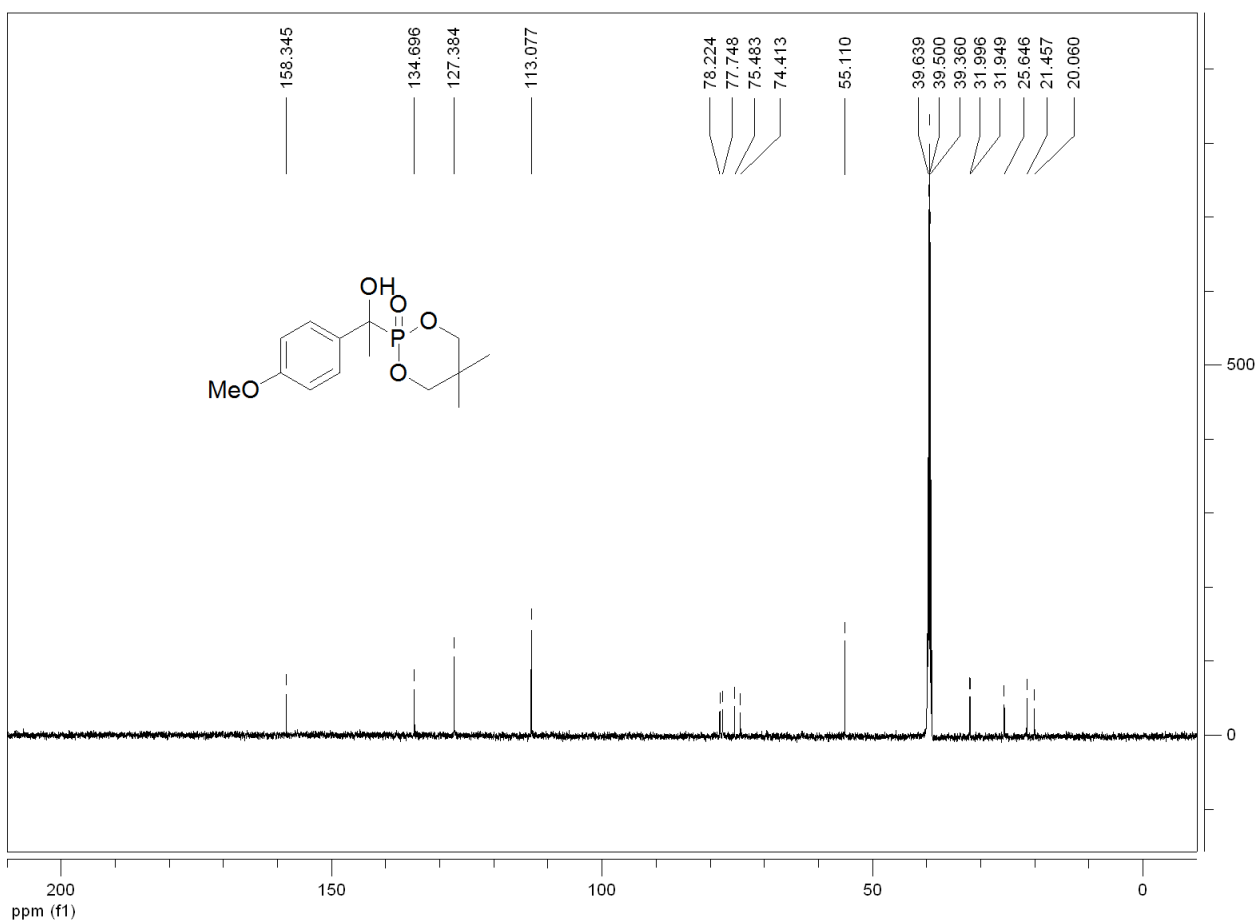

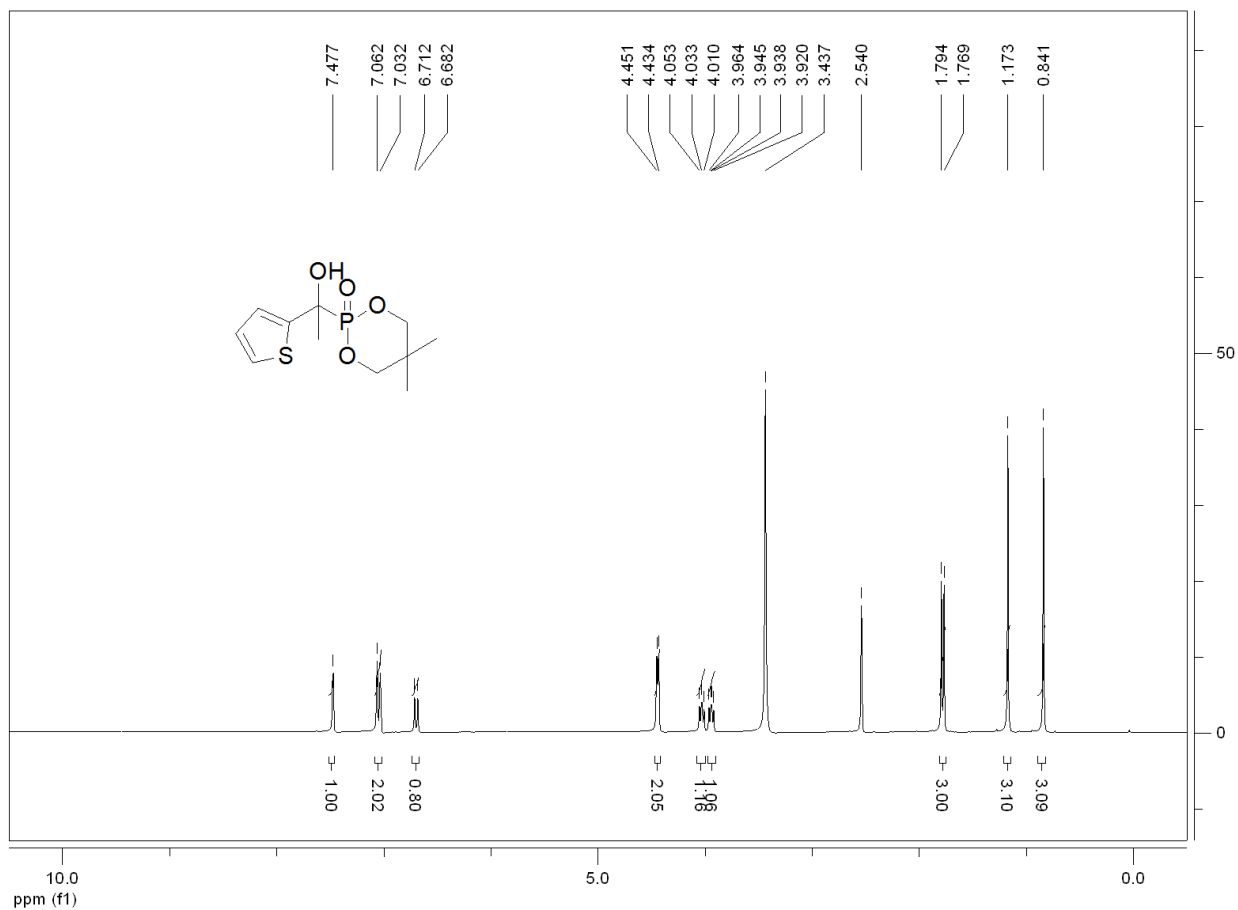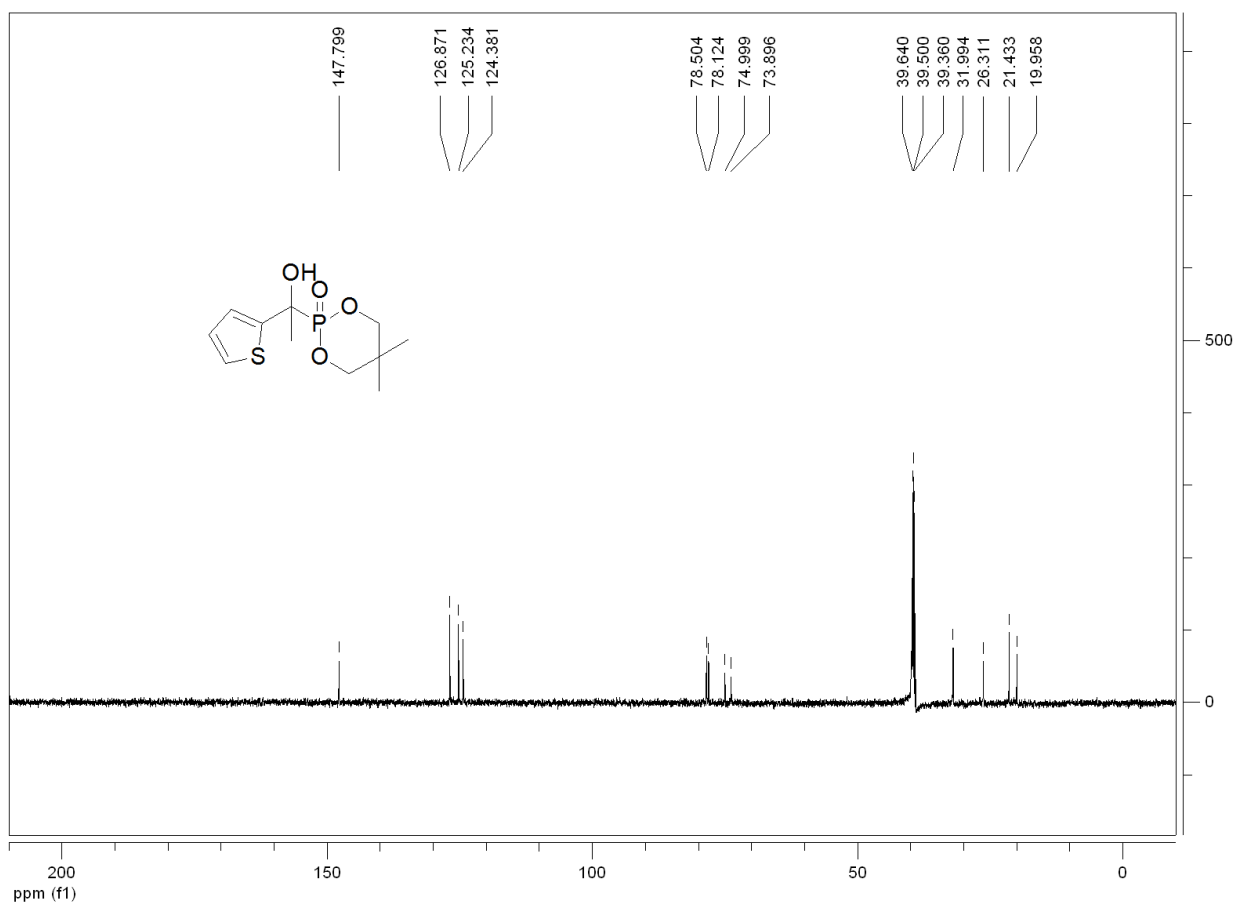

## 4. The Crystal Structures of **7g**, **8d** and (*S*)-**10d**

### Crystal data of **7g**: CCDC 806530

#### Crystal data

|                                |                                           |
|--------------------------------|-------------------------------------------|
| $C_{12}H_{15}Cl_2O_4P$         | $V = 742.08 (17) \text{ \AA}^3$           |
| $M_r = 325.11$                 | $Z = 2$                                   |
| Monoclinic, $P2_1$             | Mo $K\alpha$ radiation                    |
| $a = 7.0263 (9) \text{ \AA}$   | $\mu = 0.55 \text{ mm}^{-1}$              |
| $b = 9.9443 (13) \text{ \AA}$  | $T = 298 \text{ K}$                       |
| $c = 10.6462 (14) \text{ \AA}$ | $0.16 \times 0.12 \times 0.10 \text{ mm}$ |
| $\beta = 93.975 (2)^\circ$     |                                           |

#### Data collection

|                                                    |                                        |
|----------------------------------------------------|----------------------------------------|
| Bruker SMART APEX CCD area detector diffractometer | 2478 reflections with $I > 2\sigma(I)$ |
| 4069 measured reflections                          | $R_{int} = 0.067$                      |
| 2597 independent reflections                       | $\theta_{max} = 25.5^\circ$            |

#### Refinement

|                                 |                                                                        |
|---------------------------------|------------------------------------------------------------------------|
| $R[F^2 > 2\sigma(F^2)] = 0.042$ | H atoms treated by a mixture of independent and constrained refinement |
| $wR(F^2) = 0.105$               | $\Delta\rho_{max} = 0.39 \text{ e \AA}^{-3}$                           |
| $S = 1.01$                      | $\Delta\rho_{min} = -0.25 \text{ e \AA}^{-3}$                          |
| 2597 reflections                | Absolute structure: Flack H D (1983), Acta Cryst. A39, 876-881         |
| 177 parameters                  | Flack parameter: $-0.15 (8)$                                           |
| 1 restraints                    |                                                                        |

#### Computing details

Data collection: Bruker *SMART*; cell refinement: Bruker *SMART*; data reduction: Bruker *SAINT*; program(s) used to solve structure: *SHELXS97* (Sheldrick, 1990); program(s) used to refine structure: *SHELXL97* (Sheldrick, 1997); molecular graphics: Bruker *SHELXTL*; software used to prepare material for publication: Bruker *SHELXTL*

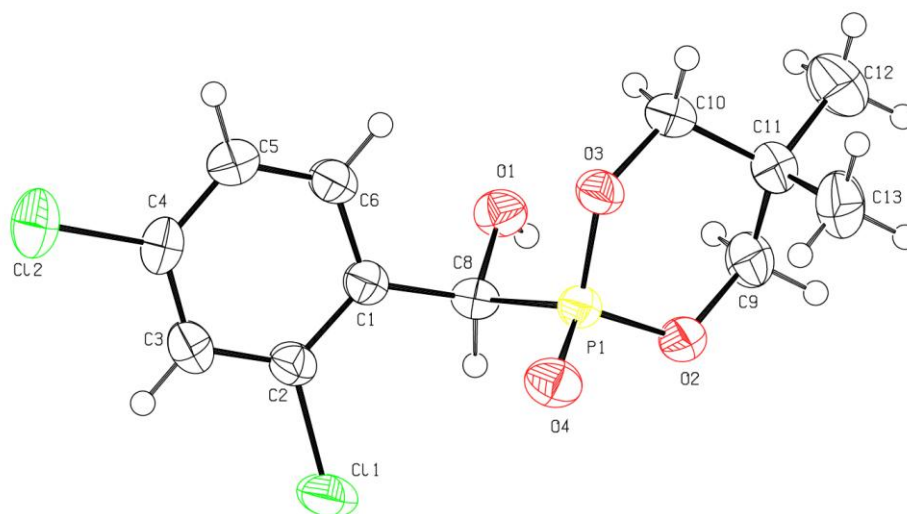

The Crystal Structures of **7g**, showing the atom-labeling scheme for the non-H atoms and 50% probability displacement ellipsoids

## Crystal data of 8d: CCDC 806531

### Crystal data

|                                |                                           |
|--------------------------------|-------------------------------------------|
| $C_{13}H_{18}BrO_4P$           | $V = 1497.7 (4) \text{ \AA}^3$            |
| $M_r = 349.15$                 | $Z = 4$                                   |
| Orthorhombic, $P2_12_12_1$     | Mo $K\alpha$ radiation                    |
| $a = 11.0662 (17) \text{ \AA}$ | $\mu = 2.86 \text{ mm}^{-1}$              |
| $b = 11.3149 (18) \text{ \AA}$ | $T = 298 \text{ K}$                       |
| $c = 11.9609 (19) \text{ \AA}$ | $0.20 \times 0.12 \times 0.10 \text{ mm}$ |

### Data collection

|                                                    |                                        |
|----------------------------------------------------|----------------------------------------|
| Bruker SMART APEX CCD area detector diffractometer | 2691 reflections with $I > 2\sigma(I)$ |
| 10072 measured reflections                         | $R_{int} = 0.114$                      |
| 3627 independent reflections                       | $\theta_{max} = 28.3^\circ$            |

### Refinement

|                                 |                                                                |
|---------------------------------|----------------------------------------------------------------|
| $R[F^2 > 2\sigma(F^2)] = 0.045$ | H-atom parameters constrained                                  |
| $wR(F^2) = 0.105$               | $\Delta\rho_{max} = 0.46 \text{ e \AA}^{-3}$                   |
| $S = 0.93$                      | $\Delta\rho_{min} = -0.45 \text{ e \AA}^{-3}$                  |
| 3627 reflections                | Absolute structure: Flack H D (1983), Acta Cryst. A39, 876-881 |
| 176 parameters                  | Flack parameter: $-0.011 (10)$                                 |
| 0 restraints                    |                                                                |

### Computing details

Data collection: Bruker *SMART*; cell refinement: Bruker *SMART*; data reduction: Bruker *SAINT*; program(s) used to solve structure: *SHELXS97* (Sheldrick, 1990); program(s) used to refine structure: *SHELXL97* (Sheldrick, 1997); molecular graphics: Bruker *SHELXTL*; software used to prepare material for publication: Bruker *SHELXTL*

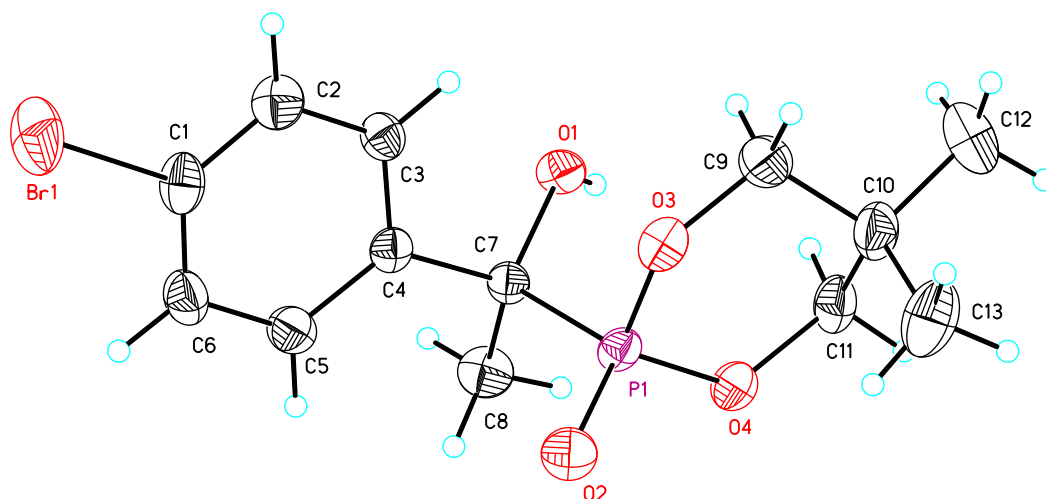

The Crystal Structures of **8d**, showing the atom-labeling scheme for the non-H atoms and 50% probability displacement ellipsoids

## Crystal data of (S)-10d: CCDC 806532

### Crystal data

|                                  |                                           |
|----------------------------------|-------------------------------------------|
| $C_{44}H_{70}Al_2Br_2Cl_4N_2O_4$ | $V = 5394.2 (11) \text{ \AA}^3$           |
| $M_r = 1046.60$                  | $Z = 4$                                   |
| Orthorhombic, $C2_22_1$          | Mo $K\alpha$ radiation                    |
| $a = 12.9848 (17) \text{ \AA}$   | $\mu = 1.77 \text{ mm}^{-1}$              |
| $b = 17.0304 (17) \text{ \AA}$   | $T = 298 \text{ K}$                       |
| $c = 24.393 (3) \text{ \AA}$     | $0.26 \times 0.20 \times 0.10 \text{ mm}$ |

### Data collection

|                                                    |                                        |
|----------------------------------------------------|----------------------------------------|
| Bruker SMART APEX CCD area detector diffractometer | 6666 independent reflections           |
| Absorption correction: $\psi$ scan<br>?            | 4745 reflections with $I > 2\sigma(I)$ |
| $T_{\min} = 0.656$ , $T_{\max} = 0.843$            | $R_{\text{int}} = 0.083$               |
| 18710 measured reflections                         | $\theta_{\max} = 28.3^\circ$           |

### Refinement

|                                 |                                                                |
|---------------------------------|----------------------------------------------------------------|
| $R[F^2 > 2\sigma(F^2)] = 0.042$ | H-atom parameters constrained                                  |
| $wR(F^2) = 0.100$               | $\Delta\rho_{\max} = 0.55 \text{ e \AA}^{-3}$                  |
| $S = 0.93$                      | $\Delta\rho_{\min} = -0.25 \text{ e \AA}^{-3}$                 |
| 6666 reflections                | Absolute structure: Flack H D (1983), Acta Cryst. A39, 876-881 |
| 271 parameters                  | Flack parameter: 0.004 (8)                                     |
| 0 restraints                    |                                                                |

### Computing details

Data collection: Bruker *SMART*; cell refinement: Bruker *SMART*; data reduction: Bruker *SAINT*; program(s) used to solve structure: *SHELXS97* (Sheldrick, 1990); program(s) used to refine structure: *SHELXL97* (Sheldrick, 1997); molecular graphics: Bruker *SHELXTL*; software used to prepare material for publication: Bruker *SHELXTL*

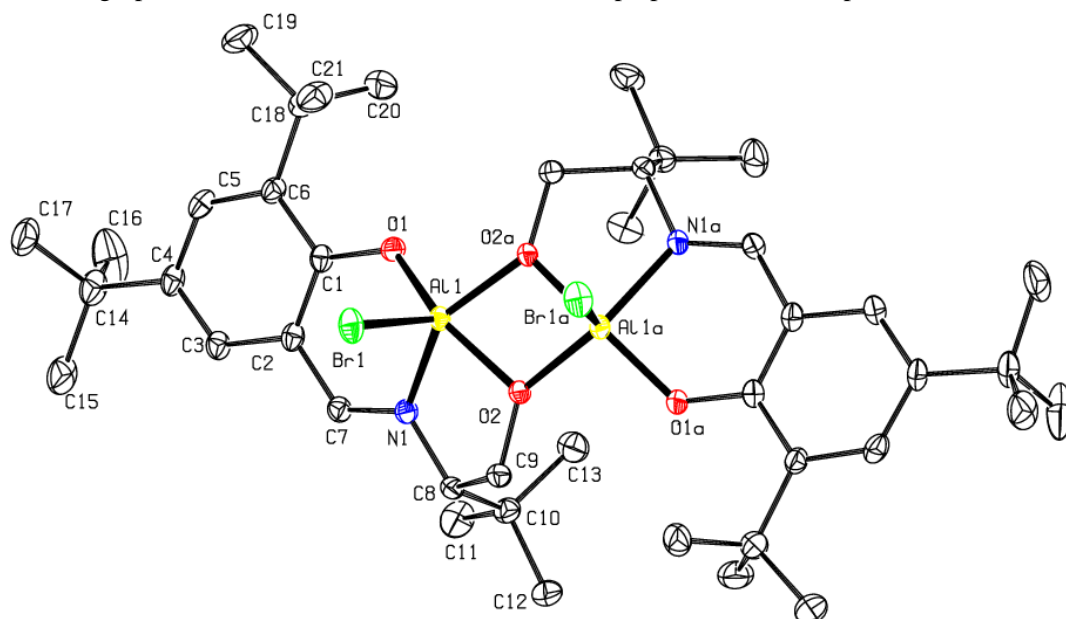

The Crystal Structures of (S)-10d, showing the atom-labeling scheme for the non-H atoms and 50% probability displacement ellipsoids
